# Supplementary material for: Study protocol for a randomised controlled trial evaluating the effect of folic acid supplementation beyond the first trimester on maternal plasma unmetabolised folic acid in late gestation
Source: PubMed Central journal article supplement — BMJ Open. 2020 Nov 16;10(11):e040416. doi: 10.1136/bmjopen-2020-040416 (PMC7670954; doi:10.1136/bmjopen-2020-040416), 2020-11-16
Supplement: bmjopen-2020-040416.draft_revisions.pdf [file bmjopen-2020-040416.draft_revisions.pdf]

# BMJ Open

BMJ Open is committed to open peer review. As part of this commitment we make the peer review history of every article we publish publicly available.

When an article is published we post the peer reviewers' comments and the authors' responses online. We also post the versions of the paper that were used during peer review. These are the versions that the peer review comments apply to.

The versions of the paper that follow are the versions that were submitted during the peer review process. They are not the versions of record or the final published versions. They should not be cited or distributed as the published version of this manuscript.

BMJ Open is an open access journal and the full, final, typeset and author-corrected version of record of the manuscript is available on our site with no access controls, subscription charges or pay-per-view fees (<http://bmjopen.bmj.com>).

If you have any questions on BMJ Open's open peer review process please email [info.bmjopen@bmj.com](mailto:info.bmjopen@bmj.com)

# BMJ Open

## Study protocol for a randomised controlled trial evaluating the effect of folic acid supplementation beyond the first trimester on maternal plasma unmetabolised folic acid in late gestation

|                               |                                                                                                                                                                                                                                                                                                                                                                                                                                                                                                                                                                                                                                                                                                                                                                                                                                                                                                                                                                                                                                                                                                                                                                                     |
|-------------------------------|-------------------------------------------------------------------------------------------------------------------------------------------------------------------------------------------------------------------------------------------------------------------------------------------------------------------------------------------------------------------------------------------------------------------------------------------------------------------------------------------------------------------------------------------------------------------------------------------------------------------------------------------------------------------------------------------------------------------------------------------------------------------------------------------------------------------------------------------------------------------------------------------------------------------------------------------------------------------------------------------------------------------------------------------------------------------------------------------------------------------------------------------------------------------------------------|
| Journal:                      | <i>BMJ Open</i>                                                                                                                                                                                                                                                                                                                                                                                                                                                                                                                                                                                                                                                                                                                                                                                                                                                                                                                                                                                                                                                                                                                                                                     |
| Manuscript ID                 | bmjopen-2020-040416                                                                                                                                                                                                                                                                                                                                                                                                                                                                                                                                                                                                                                                                                                                                                                                                                                                                                                                                                                                                                                                                                                                                                                 |
| Article Type:                 | Protocol                                                                                                                                                                                                                                                                                                                                                                                                                                                                                                                                                                                                                                                                                                                                                                                                                                                                                                                                                                                                                                                                                                                                                                            |
| Date Submitted by the Author: | 13-May-2020                                                                                                                                                                                                                                                                                                                                                                                                                                                                                                                                                                                                                                                                                                                                                                                                                                                                                                                                                                                                                                                                                                                                                                         |
| Complete List of Authors:     | <p>Sulistyoningrum, Dian; South Australian Health and Medical Research Institute, Women and Kids; The University of Adelaide, Adelaide Medical School</p> <p>Green, Tim; South Australian Health and Medical Research Institute, Women and Kids; The University of Adelaide, Adelaide Medical School</p> <p>Palmer, Debbie; Telethon Kids Institute</p> <p>Sullivan, Thomas; South Australian Health and Medical Research Institute, Women and Kids; The University of Adelaide Faculty of Health and Medical Sciences, School of Public Health</p> <p>Wood, Simon; Curtin University Faculty of Health Sciences, School of Public Health; The University of British Columbia, Food, Nutrition and Health Program</p> <p>Makrides, Maria; South Australian Health and Medical Research Institute, Women and Kids; The University of Adelaide, Adelaide Medical School</p> <p>Skubisz, Monika; South Australian Health and Medical Research Institute, Women and Kids; The University of Adelaide, Adelaide Medical School</p> <p>Best, Karen; South Australian Health and Medical Research Institute, Women and Kids Theme; The University of Adelaide, Adelaide Medical School</p> |
| Keywords:                     | NUTRITION & DIETETICS, OBSTETRICS, PUBLIC HEALTH                                                                                                                                                                                                                                                                                                                                                                                                                                                                                                                                                                                                                                                                                                                                                                                                                                                                                                                                                                                                                                                                                                                                    |
|                               |                                                                                                                                                                                                                                                                                                                                                                                                                                                                                                                                                                                                                                                                                                                                                                                                                                                                                                                                                                                                                                                                                                                                                                                     |

SCHOLARONE™  
Manuscripts

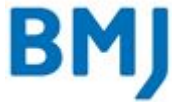

I, the Submitting Author has the right to grant and does grant on behalf of all authors of the Work (as defined in the below author licence), an exclusive licence and/or a non-exclusive licence for contributions from authors who are: i) UK Crown employees; ii) where BMJ has agreed a CC-BY licence shall apply, and/or iii) in accordance with the terms applicable for US Federal Government officers or employees acting as part of their official duties; on a worldwide, perpetual, irrevocable, royalty-free basis to BMJ Publishing Group Ltd ("BMJ") its licensees and where the relevant Journal is co-owned by BMJ to the co-owners of the Journal, to publish the Work in this journal and any other BMJ products and to exploit all rights, as set out in our [licence](#).

The Submitting Author accepts and understands that any supply made under these terms is made by BMJ to the Submitting Author unless you are acting as an employee on behalf of your employer or a postgraduate student of an affiliated institution which is paying any applicable article publishing charge ("APC") for Open Access articles. Where the Submitting Author wishes to make the Work available on an Open Access basis (and intends to pay the relevant APC), the terms of reuse of such Open Access shall be governed by a Creative Commons licence – details of these licences and which [Creative Commons](#) licence will apply to this Work are set out in our licence referred to above.

Other than as permitted in any relevant BMJ Author's Self Archiving Policies, I confirm this Work has not been accepted for publication elsewhere, is not being considered for publication elsewhere and does not duplicate material already published. I confirm all authors consent to publication of this Work and authorise the granting of this licence.

1  
2  
3 **Study protocol for a randomised controlled trial evaluating the effect of folic acid**  
4 **supplementation beyond the first trimester on maternal plasma unmetabolised folic acid in**  
5 **late gestation**  
6  
7

8 Dian C. Sulistyoningrum<sup>1,2</sup>, Timothy J. Green<sup>1,2</sup>, Debra J. Palmer<sup>3</sup>, Thomas R. Sullivan<sup>1,4</sup>, Simon  
9 Wood<sup>5,6,7</sup>, Maria Makrides<sup>1,2</sup>, Monika Skubisz<sup>1,2</sup>, Karen P. Best<sup>1,2\*</sup>

10  
11  
12 <sup>1</sup> SAHMRI Women and Kids Theme, South Australia Health and Medical Research Institute,  
13 Adelaide, South Australia, Australia

14 <sup>2</sup> Adelaide Medical School, The University of Adelaide, Adelaide, South Australia, Australia

15 <sup>3</sup> Telethon Kids Institute, University of Western Australia, 15 Hospital Avenue, Nedlands,  
16 Western Australia, 6009, Australia

17 <sup>4</sup> School of Public Health, Faculty of Health and Medical Sciences, The University of Adelaide,  
18 South Australia, Australia.

19 <sup>5</sup> School of Public Health, Faculty of Health Sciences, Curtin University, Perth, WA 6845,  
20 Australia

21 <sup>6</sup> Food, Nutrition and Health Program, University of British Columbia, Vancouver, BC V6T1Z4,  
22 Canada.

23 <sup>7</sup> InovoBiologic Inc., Calgary, AB Y2N4Y7, Canada.

24  
25  
26  
27  
28  
29 \*Corresponding author: Dr Karen P Best, 72 King William Road, North Adelaide, Australia,  
30 5006; Phone: +61 8-8128-4404; Email: karen.best@sahmri.com

31  
32  
33 **Word Count:** 2687 (max 4000 excluding title page, abstract, references, figures and tables)

34  
35  
36 **Keywords:** Pregnancy, unmetabolised folic acid, folic acid, red blood cell folate, periconception,  
37 policy, prenatal supplementation

38  
39 **Abbreviations**

40  
41  
42  
43  
44  
45  
46  
47  
48  
49  
50  
51  
52  
53  
54  
55  
56  
57  
58  
59  
60

|        |                                                      |
|--------|------------------------------------------------------|
| UMFA   | : unmetabolised folic acid                           |
| NTD    | : neural tube defect                                 |
| MTHFR  | : methylene tetrahydrofolate reductase               |
| RBC    | : red blood cell                                     |
| REDCap | : Research Electronic Data Capture                   |
| SAHMRI | : South Australian Health Medical Research Institute |
| HREC   | : Human Research Ethics Committees                   |
| WCH    | : Women's and Children's Hospital                    |
| FMC    | : Flinders Medical Centre                            |
| GMP    | : Good Manufacturing Product                         |
| DQES   | : Dietary Questionnaire for Epidemiological Studies  |

## ABSTRACT

**Introduction:** Taking folic acid containing supplements prior to and during early pregnancy reduces the risk of neural tube defects. Neural tube defects occur prior to 28 days post-conception, after which, there is no proven benefit of continuing to take folic acid. However, many women continue to take folic acid containing supplements throughout pregnancy. At higher intakes, folic acid is not converted to its active form and accumulates in circulation as unmetabolised folic acid (UMFA). Recently, concerns have been raised about possible links between late gestation folic acid supplementation and childhood allergy, metabolic disease and autism spectrum disorders. We aim to determine if removing folic acid from prenatal micronutrient supplements after 12 weeks gestation reduces circulating levels of maternal UMFA at 36 weeks gestation.

**Methods and analysis:** This is a parallel design, double-blinded randomised controlled trial. Women between 12 and 16 weeks' gestation with a singleton pregnancy and able to give informed consent are eligible to participate. Women (n=100; 50 per group) will be randomised to receive either a micronutrient supplement containing 0.8mg of folic acid or a micronutrient supplement without folic acid daily from enrolment until delivery. The primary outcome is plasma UMFA concentration at 36 weeks gestation. Secondary outcomes include red blood cell folate and total plasma folate concentration. We will assess whether there is a difference in mean UMFA levels at 36 weeks gestation between groups using linear regression with adjustment for baseline UMFA levels and gestational age at trial entry. The treatment effect will be described as a mean difference with 95% confidence interval.

1  
2  
3 **Ethics and Dissemination:** Ethical approval has been granted from the Women's and Children's  
4 Health Network Research Ethics Committee (HREC/19/WCHN/018). The results of this trial  
5 will be presented at scientific conferences and published in peer-reviewed journals.  
6  
7

8  
9 **Trial Registration Number:** ACTRN12619001511123.  
10  
11

## 12 13 14 **STRENGTHS AND LIMITATIONS OF THIS STUDY**

- 15  
16  
17     ▪ This is the first study to determine if continued supplementation of folic acid after 12  
18         weeks of gestation results in excess maternal levels of unmetabolised folic acid; in a  
19         country with mandatory folic acid fortification.  
20  
21
- 22  
23     ▪ This study will provide contemporary data regarding maternal unmetabolised folic acid  
24         levels as a result of the common practice of self-supplementation throughout pregnancy  
25         and give some insight to the biochemical effects of this practice.  
26  
27
- 28  
29     ▪ This study will provide biochemical data critical to inform future research to investigate  
30         the effect of late gestation folic acid supplementation and unmetabolised folic levels on  
31         maternal and infant health outcomes.  
32  
33
- 34  
35     ▪ This study is not powered to detect the effect of continuing folic acid supplements after  
36         the first trimester on clinical outcomes.  
37  
38  
39  
40  
41  
42  
43  
44  
45  
46  
47  
48  
49  
50  
51  
52  
53  
54  
55  
56  
57  
58  
59  
60

## INTRODUCTION

Evidence from randomised controlled trials (1,2) and a large public health intervention (3) showed that taking folic acid containing supplements prior to and during early pregnancy reduces the incidence of neural tube defects (NTD). Based on these findings, public health agencies around the world issued recommendations advising women to take folic acid supplements prior to conception and during early pregnancy.(4) For example, in Australia the government recommends that women trying to become pregnant take a folic acid supplement of 0.5 mg/day 12 weeks prior to conceiving and for the first 12 weeks of pregnancy.(5)

The neural tube closes in the first month of pregnancy, beyond this time there is no proven benefit of taking folic acid.(6) However, many women continue to take folic acid as part of a prenatal vitamin and mineral supplement throughout pregnancy.(7) In Australia, for example, a randomised controlled trial of pregnant women showed that more than 80% of women were taking a prenatal supplement containing folic acid at some time during their pregnancy,(8) with the market leading supplement containing 0.8 mg of folic acid. In addition, almost 80 countries, including Australia, have mandated the addition of folic acid to food staples, typically wheat flour, to reduce NTDs in unplanned pregnancies.(9) As such, the combination of food fortification along with prenatal supplement use may expose women and their fetus to excessive amounts of folic acid.

There is emerging evidence that higher intakes of folic acid in late pregnancy may have negative health effects on the offspring. Chief amongst these are concerns about an increased risk of childhood allergy,(10–12) but also increased rates of autism spectrum disorders (13–15) and insulin resistance.(16) Without proven benefit and the suggestion of harm, the amount of folic

1  
2  
3 acid in prenatal supplements may need to be reduced after the first trimester. Folic acid is the  
4  
5 synthetic form of the vitamin folate that is used in supplements and fortified foods because of its  
6  
7 high bioavailability and stability compared to naturally occurring folate in food.(17) Once  
8  
9 consumed, folic acid must be converted into an active form, 5-methyltetrahydrofolate.(18) At  
10  
11 higher intakes folic acid is not converted to its active form and accumulates in plasma as  
12  
13 unmetabolised folic acid (UMFA).(19) Circulating UMFA has been proposed as a biomarker of  
14  
15 excess folic acid intake.(20) We aim to determine if removing folic acid from prenatal  
16  
17 multivitamin supplements after the first trimester (12 weeks gestation) reduces the accumulation  
18  
19 of maternal UMFA measured at 36 weeks gestation.  
20  
21  
22  
23  
24  
25

## 26 **Hypotheses**

27  
28 Removing folic acid from prenatal supplements after 12 weeks of gestation will limit the  
29  
30 accumulation of UMFA in maternal plasma at 36 weeks of gestation.  
31  
32  
33  
34

## 35 **METHODS AND ANALYSIS**

### 36 37 **Trial design**

38  
39 A multicentre two arm parallel design, double-blinded randomised controlled trial.  
40  
41  
42

### 43 **Participating Centres**

44  
45 The sponsoring institution and Trial Coordinating Centre is the South Australian Health and  
46  
47 Medical Research Institute (SAHMRI) based at the Women's and Children's Hospital (WCH).  
48  
49 We will also seek approval to conduct the trial at Flinders Medical Centre (FMC), Adelaide, South  
50  
51  
52  
53  
54  
55  
56  
57  
58  
59  
60 Australia.



## Study Population

Participants are pregnant women with a singleton pregnancy enrolled between 12 and 16 weeks gestation.

## Eligibility Criteria

### *Inclusion Criteria*

To be eligible for participation women must be:

- 1) Carrying a singleton pregnancy  $\geq 12$  and  $< 16$  weeks gestation and;
- 2) Currently taking a folic acid containing supplement and planning to continue this throughout pregnancy and;
- 3) Able to give informed consent.

### *Exclusion criteria*

Women will be ineligible for trial participation if they meet any the following criteria:

- 1) Carrying a fetus with a confirmed or suspected fetal abnormality.
- 2) Unwilling to cease current folic acid containing supplement/s.
- 3) Past history of a NTD affected pregnancy.
- 4) Currently taking medication known to interfere with folate metabolism (e.g. methotrexate, sulphasalazine, anti-convulsants, antimalarials or barbiturates).
- 5) Known haemolytic anaemia or haemoglobinopathy.
- 6) Known to carry the TT variant of the methylene tetrahydrofolate reductase gene (MTHFR C77T) polymorphism.
- 7) Intolerance or allergy to prenatal vitamin and mineral supplements.

### **Study treatments**

Participating women will be randomised to receive either a micronutrient supplement containing 0.8 mg folic acid (the dose in the most commonly used supplement in Australia) or an identical micronutrient supplement containing no folic acid. The composition of micronutrients within the intervention and control supplements are formulated to approximate leading brands of prenatal micronutrient supplements available in Australia, **Table 1**. Intervention and control supplements are identical in size, shape, colour and packaging and only differ in the removal of folic acid from the intervention supplement. Women will be asked to consume one supplement per day from enrolment (12-16 weeks of gestation) until delivery.

### **Manufacture of study supplements**

Intervention and control supplements are manufactured in a licensed facility in accordance with the Code of Good Manufacturing Practice (GMP) for Medicinal Products and have been donated to the trial by Factors Group of Companies, Coquitlam, British Columbia, Canada. The capsules are packaged and labelled in accordance with GMP including an individual product identifier (ID), batch number, expiry date and the statement 'for clinical trial use only'. The pharmacist or the investigator's designee maintains accurate records of the dispensing of study product. Unused study supplements will be destroyed in compliance with applicable regulations.

### **Monitoring adherence to study treatment**

Research personnel will maintain regular contact with participating women to monitor and encourage supplement adherence and study compliance and answer any questions as they arise. At each contact, women will be asked if they have missed any supplements in the last week and if so, how many have been missed. Women are asked to return unused capsules at the final study visit (36 weeks' gestation) and the proportion of supplements returned serves as an additional

1  
2  
3 measure of compliance. At this visit women will be issued with enough supplements to last until  
4  
5 the delivery of their baby.  
6  
7

### 8 **Outcome measures**

9

10 The primary outcome is maternal plasma UMFA concentration at 36 weeks gestation.

#### 11 *Secondary outcomes*

12

- 13 • Maternal plasma total and red blood cell (RBC) folate levels at 36 weeks' gestation.
  - 14 • Gestational age at birth, birth weight, birth length, birth head circumference.
- 15  
16  
17  
18  
19

#### 20 *Safety outcomes*

21

- 22 • Neonatal complications requiring admission to the neonatal unit.
- 23 • Pregnancy complications requiring hospital admission.
- 24 • Serious adverse events defined as: maternal or fetal (>20 weeks) deaths, fetal loss (< 20  
25 weeks), maternal or neonatal admissions to intensive care and major congenital  
26 anomalies.  
27  
28  
29  
30  
31  
32  
33

### 34 **Participant timeline**

35

36  
37 Women will be randomised and asked to cease their current prenatal supplements immediately  
38 and for the duration of the study. At enrolment, following informed consent and prior to  
39 commencement of the study treatment, research personnel will collect baseline clinical and  
40 demographic data including: contact details, self-reported ethnicity, gravida, parity, age,  
41 supplement and prescription drug use, weight, height, highest level of education, occupation and  
42 smoking status. Maternal dietary intakes of folate and other one-carbon nutrients during early  
43 and late pregnancy will be collected with the use of an 80-item semi-quantitative food-frequency  
44 questionnaire – Dietary Questionnaire for Epidemiological Studies (DQES v3.2).(21) A 10ml  
45 venous blood sample will be collected by venepuncture to assess UMFA, folate status and full  
46  
47  
48  
49  
50  
51  
52  
53  
54  
55  
56  
57  
58  
59  
60

1  
2  
3 blood count. The time the woman last ate and drank as well as the time her last supplement was  
4  
5 taken will be recorded. Research personnel will contact the participant one week following the  
6  
7 enrolment visit and then monthly to ensure adherence and record adverse events, Figure 1. At 36  
8  
9 weeks' gestation participating women will attend a clinic appointment for collection of venous  
10  
11 blood sample for UMFA and folate analysis and full blood count. Participants will be asked to  
12  
13 return unused supplements which will be counted as a measure of compliance. The food-  
14  
15 frequency questionnaire will be repeated and women will be given enough supplements to last  
16  
17 the remainder of their pregnancy. Following delivery, research personnel will extract details of  
18  
19 pregnancy, labour and birth from the woman and her baby's medical records. Blood samples will  
20  
21 be analysed for UMFA according to established methods.(22) Plasma folate (nmol/L) and  
22  
23 erythrocyte folate (nmol/L) concentrations will be determined using the folate microbiological  
24  
25 assay harmonized by the Centers for Disease Control and Prevention.(23)  
26  
27  
28  
29  
30  
31  
32  
33  
34  
35  
36  
37  
38  
39  
40  
41  
42  
43  
44  
45  
46  
47  
48  
49  
50  
51  
52  
53  
54  
55  
56  
57  
58  
59  
60

Figure 1. Folic Acid Trial Schedule

|                                      | Screening | Enrolment   | Allocation | +1 week   |            | Post-allocation |       |       |       |        |
|--------------------------------------|-----------|-------------|------------|-----------|------------|-----------------|-------|-------|-------|--------|
| TIMEPOINT**                          |           | $-t_1$      | 0          | $t_1$     | $t_{1a}^*$ | $t_2$           | $t_3$ | $t_4$ | $t_5$ | $t_6$  |
| <b>ENROLMENT:</b>                    | <12w      | >12 to <16w |            | 13 to 17w | 16w        | 20w             | 24w   | 28w   | 32w   | 36w    |
| <b>Eligibility screen</b>            | Clinic    | Clinic      | Clinic     | Phone     | SMS        | SMS             | SMS   | SMS   | Phone | Clinic |
| <b>Consent to Contact</b>            | X         | X           |            |           |            |                 |       |       |       |        |
| <b>Informed consent</b>              | X         |             |            |           |            |                 |       |       |       |        |
| <b>Randomisation</b>                 |           | X           |            |           |            |                 |       |       |       |        |
| <b>Demographic data</b>              |           | X           |            |           |            |                 |       |       |       |        |
| <b>Allocation</b>                    |           |             | X          |           |            |                 |       |       |       |        |
| <b>INTERVENTION:</b>                 |           |             |            |           |            |                 |       |       |       |        |
| <b>ASSESSMENTS:</b>                  |           |             |            |           |            |                 |       |       |       |        |
| <b>Maternal Folate status</b>        |           | X           |            |           |            |                 |       |       |       | X      |
| <b>Maternal UMFA status</b>          |           | X           |            |           |            |                 |       |       |       | X      |
| <b>Food Frequency Questionnaire</b>  |           | X           |            |           |            |                 |       |       |       | X      |
| <b>Adverse events</b>                |           |             |            |           | X          | X               |       | X     |       | X      |
| <b>Serious Adverse events</b>        |           |             |            |           |            |                 |       |       |       | X      |
| <b>Compliance – maternal report</b>  |           |             |            |           | X          | X               | X     | X     | X     | X      |
| <b>Compliance – Supplement count</b> |           |             |            |           |            |                 |       |       |       | X      |

### Sample size

A sample size of 90 women (45 per group) will provide >90% power to detect a standardised difference in mean UMFA concentration at 36 weeks gestation between groups of 0.60 (two-tailed alpha=0.05, correlation between UMFA concentrations at baseline and 36 weeks of gestation=0.60).(24) Calculations were performed based on a standardised mean difference (mean difference divided by standard deviation of outcome at 36 weeks gestation) due to considerable variability in the literature in the reported standard deviation for UMFA concentration in pregnancy.(12,24) A standardised mean difference of 0.60 represents a medium effect size and

1  
2  
3 would demonstrate biologically excessive folic acid consumption. To allow for 10% loss to follow-  
4  
5 up, we will randomise 50 women per group.  
6  
7

## 8 **Recruitment**

9

10 Pregnant women will be recruited through a combination of flyers, posters, a digital media  
11  
12 campaign and through in-person recruitment at antenatal clinics. Women who meet eligibility  
13  
14 criteria and agree to participate are invited to attend an enrolment appointment at our research  
15  
16 clinics at the Women's and Children's Hospital or Flinders Medical Centre, Adelaide between 12  
17  
18 and 16 weeks gestation.  
19  
20  
21

## 22 **Randomisation procedures**

23

24  
25 Participants will be randomised using a secure web-based randomisation service. Allocation will  
26  
27 follow a computer-generated randomisation schedule using balanced variable block sizes,  
28  
29 prepared by an independent statistician who is not involved with trial participants or data  
30  
31 analysis. A unique four-digit study identification number and a coloured coded study pack are  
32  
33 assigned. The study identification number identifies the randomised woman and the coloured  
34  
35 product identifies either intervention or control supplements, pre-packaged corresponding to the  
36  
37 randomisation schedule. Stratification will be by gestational age at trial entry 12 to  $\leq 14$  weeks or  
38  
39  $>14$  to 16 weeks gestation.  
40  
41  
42  
43

## 44 **Blinding**

45

46  
47 Participants and their family, care providers, outcome assessors, research personnel and data  
48  
49 analysts are blinded to randomisation group. The intervention and control supplements are  
50  
51 identical in size, shape, colour, packaging and labelling and uniquely identified by the coloured  
52  
53 product identification label (Yellow, Pink, Blue or Green). The randomisation code for an  
54  
55  
56  
57  
58  
59  
60

1  
2  
3 individual participant may be unblinded by the independent statistician in the event of an  
4  
5 emergency.  
6  
7

### 8 **Data collection and trial management**

9

10 Data are collected by trained research personnel and entered directly into an electronic case-  
11  
12 report form with password protection and defined user-level access Research Electronic Data  
13  
14 Capture (REDCap). A record of all women approached, screened for eligibility and consented  
15  
16 will be recorded.(25) Once consented and randomised, REDCap automatically calculates study  
17  
18 milestones for each participant. This information is readily available for clinical trial staff to  
19  
20 enable scheduling of appointments and sample collection. Summary reports including screening  
21  
22 data, enrolment, appointment attendance, sample collection, serious adverse events and study  
23  
24 completion are generated from REDCap and reviewed at monthly trial steering committee  
25  
26 meetings. Electronic data are stored on secure servers at South Australia Health and Medical  
27  
28 Research Institute and released only to persons authorised to receive those data.  
29  
30  
31  
32  
33

### 34 **Statistical analysis**

35

36  
37 Statistical analyses will be performed on an intention-to-treat basis according to a pre-specified  
38  
39 statistical analysis plan. For the primary outcome, we will assess whether there is a difference in  
40  
41 mean UMFA levels at 36 weeks gestation between groups using linear regression, with  
42  
43 adjustment for baseline UMFA and the stratification variable gestational age at trial entry (12 to  
44  
45  $\leq 14$  weeks or  $> 14$  weeks). The treatment effect will be described as a mean difference with 95%  
46  
47 confidence interval. Secondary outcomes will be analysed using linear and logistic regression  
48  
49 models for continuous and binary outcomes, respectively, again with adjustment for gestational  
50  
51 age at trial entry. Safety outcomes will be compared between groups using Fisher exact tests. In  
52  
53 all analyses, a two-sided p-value  $<0.05$  will be taken to indicate statistical significance.  
54  
55  
56  
57  
58  
59  
60

## **ETHICS AND DISSEMINATION**

### **Human Research Ethics Approval**

This protocol, the informed consent and participant information document and all participant communication have been approved by the Women's and Children's Health Network Research Ethics Committee (HREC) (HREC/19/WCHN/018) and Governance (SSA/19/WCHN/080). Governance approval has also been obtained from FMC. Any subsequent modifications will be reviewed and approved by the HREC and governance of each study site. The study will be conducted in compliance with the current approved version of the protocol. Any change to the protocol document or informed consent form that affects the scientific intent, study design, patient safety, or may affect a participant's willingness to continue participation in the study will be considered a major amendment. All such amendments will be submitted to the HREC for approval. Any other changes to the protocol (such as administrative changes to dates and study personnel) will be considered minor amendments and will be notified to the HREC as appropriate.

### **Confidentiality**

Participant confidentiality is strictly held in trust by the participating investigators, research staff and their agents. This confidentiality is extended to cover testing of biological samples in addition to the clinical information relating to participants. Regulatory authorities may inspect all documents and records required to be maintained by the Investigator, including but not limited to, medical records for the women and/or infants in this study subject to individuals having obtained approval/clearance through State/National Governments and HREC as required by local laws. Clinical information will not be released without written permission of the parent, except as necessary for monitoring by HREC or regulatory agencies.



### **Patient and public involvement**

The study was supported by a consumer advisory group which provided input to the protocol. A Consumer representative from our SAHMRI Women and Kids Consumer Advisory Group partnered with us for the design of the study, informational material to support the intervention, and the burden of the intervention from the participant's perspective. We will meet with the consumer representative for this trial and the full Consumer Advisory group on a regular basis for the duration of the study. At the end of the study, the consumer advisory group will be given the opportunity to comment on the findings and contribute to the dissemination plan.

### **Dissemination Plan**

Study findings will be submitted for peer-reviewed publication and for presentation at appropriate local and international conferences. In addition, study findings will be disseminated to participants through a one-page lay summary. Results will be made available to the wider community through social media avenues and the SAHMRI website.

### **Authors' contributions**

KPB, TJG, MM, DP and MS conceived the trial and proposed the trial design; TS advised on sample size calculations, trial design, and analysis; SW and TJG designed the prenatal supplement and had it manufactured; DCS advised on analytical methodology; DCS, TJG and KPB drafted the protocol, all authors contributed to refinement of the study and approved the final manuscript.

### **Funding statement**

This study is supported by a Project Grant from the Women's and Children's Hospital Foundation. An Ella McKnight Scholarship from the Royal Australian and New Zealand College

1  
2  
3 of Obstetricians and Gynaecologists supports MS. KPB is supported by a Women's and  
4 Children's Hospital Foundation, MS McLeod Postdoctoral Research Fellowship. DCS is  
5 supported by the Australian Government Research Training Program Scholarship from The  
6 University of Adelaide. The study product is donated by Factors Group of Companies,  
7 Coquitlam, British Columbia, Canada. The funder/s have no role in the study design; collection,  
8 management, analysis, and interpretation of data; writing of the report; and the decision to submit  
9 the report for publication and have no authority over any of these activities.  
10  
11  
12  
13  
14  
15  
16  
17  
18

### 19 **Competing interest statement**

20  
21  
22 Dr. Makrides reports that she has a financial relationship outside the submitted work with Trajan  
23 Nutrition as a member of the board. Simon Wood is a consultant for the Factors Group of  
24 Companies. DCS, TJG, DJP, TS MS, and KPB have nothing to disclose.  
25  
26  
27  
28  
29

### 30 **Data sharing statement**

31  
32 Once the primary trial is published, data will be available for data sharing to appropriately  
33 qualified investigators upon submission of a protocol and approval by the Trial Steering  
34 Committee. Please send requests to Dr Karen P Best (karen.best@sahmri.com).  
35  
36  
37  
38  
39  
40  
41  
42  
43  
44  
45  
46  
47  
48  
49  
50  
51  
52  
53  
54  
55  
56  
57  
58  
59  
60

**Table 1. Ingredients of Supplements for Intervention and Control Groups**

| <b>Ingredients</b> | <b>Intervention</b> | <b>Control</b> | <b>unit</b> |
|--------------------|---------------------|----------------|-------------|
| folic acid         | 0                   | 0.8            | mg          |
| calcium            | 250                 | 250            | mg          |
| Iron               | 27                  | 27             | mg          |
| thiamine           | 1.4                 | 1.4            | mg          |
| riboflavin         | 1.4                 | 1.4            | mg          |
| niacinamide        | 18                  | 18             | mg          |
| vitamin B-6        | 1.9                 | 1.9            | mg          |
| vitamin B-12       | 2.6                 | 2.6            | mcg         |
| pantothenic acid   | 6                   | 6              | mg          |
| biotin             | 30                  | 30             | mg          |
| vitamin C          | 85                  | 85             | mg          |
| vitamin E          | 13.5                | 13.5           | IU          |
| magnesium          | 50                  | 50             | mg          |
| zinc               | 7.5                 | 7.5            | mg          |
| manganese          | 2.0                 | 2.0            | mg          |
| iodine             | 0.22                | 0.22           | mg          |
| copper             | 1                   | 1              | mg          |
| chromium           | 30                  | 1              | mcg         |
| selenium           | 30                  | 30             | mcg         |
| Vitamin D3         | 10                  | 10             | mcg         |
| b-carotene         | 2500                | 2500           | IU          |

**REFERENCES**

1. Wald N, Sneddon J. Prevention of neural tube defects: Results of the Medical Research Council Vitamin Study. *Lancet*. 1991 Jul 20;338(8760):131.
2. Czeizel AE, Dudás I. Prevention of the first occurrence of neural-tube defects by periconceptional vitamin supplementation. *N Engl J Med*. 1992 Dec 24;327(26):1832–5.
3. Crider KS, Qi YP, Devine O, Tinker SC, Berry RJ. Modeling the impact of folic acid fortification and supplementation on red blood cell folate concentrations and predicted neural tube defect risk in the United States: have we reached optimal prevention? *Am J Clin Nutr*. 2018 Jun 1;107(6):1027–34.
4. Weltgesundheitsorganisation. WHO recommendations on antenatal care for a positive pregnancy experience. Geneva, Switzerland: World Health Organization; 2016. 152 p.
5. RANZCOG - Antenatal Care during Pregnancy [Internet]. [cited 2020 Mar 11]. Available from: <https://ranzcog.edu.au/womens-health/patient-information-resources/antenatal-care-during-pregnancy>
6. Sadler TW. Embryology of neural tube development. *American Journal of Medical Genetics Part C: Seminars in Medical Genetics*. 2005;135C(1):2–8.
7. McNulty B, McNulty H, Marshall B, Ward M, Molloy AM, Scott JM, et al. Impact of continuing folic acid after the first trimester of pregnancy: findings of a randomized trial of Folic Acid Supplementation in the Second and Third Trimesters. *Am J Clin Nutr*. 2013 Jul;98(1):92–8.
8. Makrides M, Best K, Yelland L, McPhee A, Zhou S, Quinlivan J, et al. A Randomized Trial of Prenatal n–3 Fatty Acid Supplementation and Preterm Delivery. *N Engl J Med*. 2019 Sep 12;381(11):1035–45.
9. Australian Institute of Health and Welfare. Monitoring the health impacts of mandatory folic acid and iodine fortification 2016. [Internet]. 2016 [cited 2020 Mar 11]. Available from: <https://www.aihw.gov.au/reports/food-nutrition/monitoring-health-impacts-of-mandatory-folic-acid/contents/table-of-contents>
10. McStay CL, Prescott SL, Bower C, Palmer DJ. Maternal Folic Acid Supplementation during Pregnancy and Childhood Allergic Disease Outcomes: A Question of Timing? *Nutrients* [Internet]. 2017 Feb 9 [cited 2020 Mar 11];9(2). Available from: <https://www.ncbi.nlm.nih.gov/pmc/articles/PMC5331554/>
11. Whitrow MJ, Moore VM, Rumbold AR, Davies MJ. Effect of Supplemental Folic Acid in Pregnancy on Childhood Asthma: A Prospective Birth Cohort Study. *Am J Epidemiol*. 2009 Dec 15;170(12):1486–93.
12. McGowan EC, Hong X, Selhub J, Paul L, Wood RA, Matsui EC, et al. Association Between Folate Metabolites and the Development of Food Allergy in Children. *The Journal of Allergy and Clinical Immunology: In Practice*. 2020 Jan 1;8(1):132-140.e5.

13. Levine SZ, Kodesh A, Viktorin A, Smith L, Uher R, Reichenberg A, et al. Association of Maternal Use of Folic Acid and Multivitamin Supplements in the Periods Before and During Pregnancy With the Risk of Autism Spectrum Disorder in Offspring. *JAMA Psychiatry*. 2018 Feb;75(2):176–84.
14. Raghavan R, Riley AW, Volk H, Caruso D, Hironaka L, Sices L, et al. Maternal Multivitamin Intake, Plasma Folate and Vitamin B12 Levels and Autism Spectrum Disorder Risk in Offspring. *Paediatr Perinat Epidemiol*. 2018;32(1):100–11.
15. DeSoto M, Hitlan R. Synthetic folic acid supplementation during pregnancy may increase the risk of developing autism. *J Pediatr Biochem*. 2016 Aug 1;02(04):251–61.
16. Yajnik CS, Deshpande SS, Jackson AA, Refsum H, Rao S, Fisher DJ, et al. Vitamin B12 and folate concentrations during pregnancy and insulin resistance in the offspring: the Pune Maternal Nutrition Study. *Diabetologia*. 2008 Jan;51(1):29–38.
17. Bailey LB, Gregory JF. Folate metabolism and requirements. *J Nutr*. 1999 Apr;129(4):779–82.
18. IUPAC-IUB Joint Commission on Biochemical Nomenclature (JCBN). Nomenclature and symbols for folic acid and related compounds. Recommendations 1986. *Eur J Biochem*. 1987 Oct 15;168(2):251–3.
19. Pfeiffer CM, Sternberg MR, Fazili Z, Yetley EA, Lacher DA, Bailey RL, et al. Unmetabolized Folic Acid Is Detected in Nearly All Serum Samples from US Children, Adolescents, and Adults 1234. *J Nutr*. 2015 Mar;145(3):520–31.
20. Plumptre L, Masih SP, Ly A, Aufreiter S, Sohn K-J, Croxford R, et al. High concentrations of folate and unmetabolized folic acid in a cohort of pregnant Canadian women and umbilical cord blood. *Am J Clin Nutr*. 2015 Oct 1;102(4):848–57.
21. Hodge A, Patterson AJ, Brown WJ, Ireland P, Giles G. The Anti Cancer Council of Victoria FFQ: relative validity of nutrient intakes compared with weighed food records in young to middle-aged women in a study of iron supplementation. *Australian and New Zealand Journal of Public Health*. 2000;24(6):576–83.
22. Zayed A, Bustami R, Alabsi W, El-Elimat T. Development and Validation of a Rapid High-Performance Liquid Chromatography–Tandem Mass Spectrometric Method for Determination of Folic Acid in Human Plasma. *Pharmaceuticals (Basel)* [Internet]. 2018 May 27 [cited 2020 Mar 11];11(2). Available from: <https://www.ncbi.nlm.nih.gov/pmc/articles/PMC6027057/>
23. Zhang M, Sternberg MR, Pfeiffer CM. Harmonizing the Calibrator and Microorganism Used in the Folate Microbiological Assay Increases the Comparability of Serum and Whole-Blood Folate Results in a CDC Round-Robin Study. *J Nutr*. 2018 May 1;148(5):807–17.

- 1
- 2
- 3 24. Pentieva K, Selhub J, Paul L, Molloy AM, McNulty B, Ward M, et al. Evidence from a
- 4 Randomized Trial That Exposure to Supplemental Folic Acid at Recommended Levels
- 5 during Pregnancy Does Not Lead to Increased Unmetabolized Folic Acid Concentrations in
- 6 Maternal or Cord Blood. *J Nutr*. 2016 Mar;146(3):494–500.
- 7
- 8
- 9 25. Schulz KF, Altman DG, Moher D, the CONSORT Group. CONSORT 2010 Statement:
- 10 updated guidelines for reporting parallel group randomised trials. *BMC Medicine*. 2010
- 11 Mar 24;8(1):18.
- 12
- 13
- 14
- 15
- 16
- 17
- 18
- 19
- 20
- 21
- 22
- 23
- 24
- 25
- 26
- 27
- 28
- 29
- 30
- 31
- 32
- 33
- 34
- 35
- 36
- 37
- 38
- 39
- 40
- 41
- 42
- 43
- 44
- 45
- 46
- 47
- 48
- 49
- 50
- 51
- 52
- 53
- 54
- 55
- 56
- 57
- 58
- 59
- 60

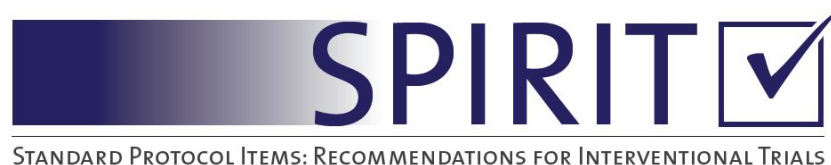

STANDARD PROTOCOL ITEMS: RECOMMENDATIONS FOR INTERVENTIONAL TRIALS

SPIRIT 2013 Checklist: Recommended items to address in a clinical trial protocol and related documents\*

| Section/item                      | Item No | Description                                                                                                                                                                                                                                                                              | Addressed on page number |
|-----------------------------------|---------|------------------------------------------------------------------------------------------------------------------------------------------------------------------------------------------------------------------------------------------------------------------------------------------|--------------------------|
| <b>Administrative information</b> |         |                                                                                                                                                                                                                                                                                          |                          |
| Title                             | 1       | Descriptive title identifying the study design, population, interventions, and, if applicable, trial acronym                                                                                                                                                                             | 1                        |
| Trial registration                | 2a      | Trial identifier and registry name. If not yet registered, name of intended registry                                                                                                                                                                                                     | 3                        |
|                                   | 2b      | All items from the World Health Organization Trial Registration Data Set                                                                                                                                                                                                                 | Yes                      |
| Protocol version                  | 3       | Date and version identifier                                                                                                                                                                                                                                                              | Supp.                    |
| Funding                           | 4       | Sources and types of financial, material, and other support                                                                                                                                                                                                                              | 14-15                    |
| Roles and responsibilities        | 5a      | Names, affiliations, and roles of protocol contributors                                                                                                                                                                                                                                  | 1                        |
|                                   | 5b      | Name and contact information for the trial sponsor                                                                                                                                                                                                                                       | N/A                      |
|                                   | 5c      | Role of study sponsor and funders, if any, in study design; collection, management, analysis, and interpretation of data; writing of the report; and the decision to submit the report for publication, including whether they will have ultimate authority over any of these activities | N/A                      |
|                                   | 5d      | Composition, roles, and responsibilities of the coordinating centre, steering committee, endpoint adjudication committee, data management team, and other individuals or groups overseeing the trial, if applicable (see Item 21a for data monitoring committee)                         | 12, 13                   |

1 **Introduction**

|    |                                                           |     |                                                                                                               |                   |
|----|-----------------------------------------------------------|-----|---------------------------------------------------------------------------------------------------------------|-------------------|
| 2  |                                                           |     |                                                                                                               |                   |
| 3  | Background and                                            | 6a  | Description of research question and justification for undertaking the trial, including summary of relevant   | 4-5               |
| 4  | rationale                                                 |     | studies (published and unpublished) examining benefits and harms for each intervention                        |                   |
| 5  |                                                           |     |                                                                                                               |                   |
| 6  |                                                           | 6b  | Explanation for choice of comparators                                                                         | 4-5               |
| 7  |                                                           |     |                                                                                                               |                   |
| 8  | Objectives                                                | 7   | Specific objectives or hypotheses                                                                             | 5, 8              |
| 9  |                                                           |     |                                                                                                               |                   |
| 10 | Trial design                                              | 8   | Description of trial design including type of trial (eg, parallel group, crossover, factorial, single group), |                   |
| 11 |                                                           |     | allocation ratio, and framework (eg, superiority, equivalence, noninferiority, exploratory)                   | 5                 |
| 12 |                                                           |     |                                                                                                               |                   |
| 13 |                                                           |     |                                                                                                               |                   |
| 14 | <b>Methods: Participants, interventions, and outcomes</b> |     |                                                                                                               |                   |
| 15 |                                                           |     |                                                                                                               |                   |
| 16 | Study setting                                             | 9   | Description of study settings (eg, community clinic, academic hospital) and list of countries where data will | 5                 |
| 17 |                                                           |     | be collected. Reference to where list of study sites can be obtained                                          |                   |
| 18 |                                                           |     |                                                                                                               |                   |
| 19 | Eligibility criteria                                      | 10  | Inclusion and exclusion criteria for participants. If applicable, eligibility criteria for study centres and  | 6                 |
| 20 |                                                           |     | individuals who will perform the interventions (eg, surgeons, psychotherapists)                               |                   |
| 21 |                                                           |     |                                                                                                               |                   |
| 22 | Interventions                                             | 11a | Interventions for each group with sufficient detail to allow replication, including how and when they will be | 7                 |
| 23 |                                                           |     | administered                                                                                                  |                   |
| 24 |                                                           |     |                                                                                                               |                   |
| 25 |                                                           | 11b | Criteria for discontinuing or modifying allocated interventions for a given trial participant (eg, drug dose  | N/A               |
| 26 |                                                           |     | change in response to harms, participant request, or improving/worsening disease)                             |                   |
| 27 |                                                           |     |                                                                                                               |                   |
| 28 |                                                           | 11c | Strategies to improve adherence to intervention protocols, and any procedures for monitoring adherence        | 7                 |
| 29 |                                                           |     | (eg, drug tablet return, laboratory tests)                                                                    |                   |
| 30 |                                                           |     |                                                                                                               |                   |
| 31 |                                                           | 11d | Relevant concomitant care and interventions that are permitted or prohibited during the trial                 | N/A               |
| 32 |                                                           |     |                                                                                                               |                   |
| 33 | Outcomes                                                  | 12  | Primary, secondary, and other outcomes, including the specific measurement variable (eg, systolic blood       |                   |
| 34 |                                                           |     | pressure), analysis metric (eg, change from baseline, final value, time to event), method of aggregation (eg, | 8                 |
| 35 |                                                           |     | median, proportion), and time point for each outcome. Explanation of the clinical relevance of chosen         |                   |
| 36 |                                                           |     | efficacy and harm outcomes is strongly recommended                                                            |                   |
| 37 |                                                           |     |                                                                                                               |                   |
| 38 | Participant timeline                                      | 13  | Time schedule of enrolment, interventions (including any run-ins and washouts), assessments, and visits for   | 8, 9, 10 & Fig. 1 |
| 39 |                                                           |     | participants. A schematic diagram is highly recommended (see Figure)                                          |                   |
| 40 |                                                           |     |                                                                                                               |                   |
| 41 |                                                           |     |                                                                                                               |                   |
| 42 |                                                           |     |                                                                                                               |                   |
| 43 |                                                           |     |                                                                                                               |                   |
| 44 |                                                           |     |                                                                                                               |                   |
| 45 |                                                           |     |                                                                                                               |                   |
| 46 |                                                           |     |                                                                                                               |                   |



|    |                                                                     |     |                                                                                                                                                                                                                                                                                                                                                                                                              |           |
|----|---------------------------------------------------------------------|-----|--------------------------------------------------------------------------------------------------------------------------------------------------------------------------------------------------------------------------------------------------------------------------------------------------------------------------------------------------------------------------------------------------------------|-----------|
| 1  | Sample size                                                         | 14  | Estimated number of participants needed to achieve study objectives and how it was determined, including clinical and statistical assumptions supporting any sample size calculations                                                                                                                                                                                                                        | 10, 11    |
| 2  |                                                                     |     |                                                                                                                                                                                                                                                                                                                                                                                                              |           |
| 3  |                                                                     |     |                                                                                                                                                                                                                                                                                                                                                                                                              |           |
| 4  | Recruitment                                                         | 15  | Strategies for achieving adequate participant enrolment to reach target sample size                                                                                                                                                                                                                                                                                                                          | 11        |
| 5  |                                                                     |     |                                                                                                                                                                                                                                                                                                                                                                                                              |           |
| 6  |                                                                     |     |                                                                                                                                                                                                                                                                                                                                                                                                              |           |
| 7  | <b>Methods: Assignment of interventions (for controlled trials)</b> |     |                                                                                                                                                                                                                                                                                                                                                                                                              |           |
| 8  | Allocation:                                                         |     |                                                                                                                                                                                                                                                                                                                                                                                                              |           |
| 9  |                                                                     |     |                                                                                                                                                                                                                                                                                                                                                                                                              |           |
| 10 | Sequence                                                            | 16a | Method of generating the allocation sequence (eg, computer-generated random numbers), and list of any factors for stratification. To reduce predictability of a random sequence, details of any planned restriction (eg, blocking) should be provided in a separate document that is unavailable to those who enrol participants or assign interventions                                                     | 11        |
| 11 | generation                                                          |     |                                                                                                                                                                                                                                                                                                                                                                                                              |           |
| 12 |                                                                     |     |                                                                                                                                                                                                                                                                                                                                                                                                              |           |
| 13 |                                                                     |     |                                                                                                                                                                                                                                                                                                                                                                                                              |           |
| 14 |                                                                     |     |                                                                                                                                                                                                                                                                                                                                                                                                              |           |
| 15 |                                                                     |     |                                                                                                                                                                                                                                                                                                                                                                                                              |           |
| 16 | Allocation                                                          | 16b | Mechanism of implementing the allocation sequence (eg, central telephone; sequentially numbered, opaque, sealed envelopes), describing any steps to conceal the sequence until interventions are assigned                                                                                                                                                                                                    | 11        |
| 17 | concealment                                                         |     |                                                                                                                                                                                                                                                                                                                                                                                                              |           |
| 18 | mechanism                                                           |     |                                                                                                                                                                                                                                                                                                                                                                                                              |           |
| 19 |                                                                     |     |                                                                                                                                                                                                                                                                                                                                                                                                              |           |
| 20 | Implementation                                                      | 16c | Who will generate the allocation sequence, who will enrol participants, and who will assign participants to interventions                                                                                                                                                                                                                                                                                    | 8, 11, 12 |
| 21 |                                                                     |     |                                                                                                                                                                                                                                                                                                                                                                                                              |           |
| 22 |                                                                     |     |                                                                                                                                                                                                                                                                                                                                                                                                              |           |
| 23 |                                                                     |     |                                                                                                                                                                                                                                                                                                                                                                                                              |           |
| 24 | Blinding (masking)                                                  | 17a | Who will be blinded after assignment to interventions (eg, trial participants, care providers, outcome assessors, data analysts), and how                                                                                                                                                                                                                                                                    | 11, 12    |
| 25 |                                                                     |     |                                                                                                                                                                                                                                                                                                                                                                                                              |           |
| 26 |                                                                     |     |                                                                                                                                                                                                                                                                                                                                                                                                              |           |
| 27 |                                                                     | 17b | If blinded, circumstances under which unblinding is permissible, and procedure for revealing a participant's allocated intervention during the trial                                                                                                                                                                                                                                                         | 12        |
| 28 |                                                                     |     |                                                                                                                                                                                                                                                                                                                                                                                                              |           |
| 29 |                                                                     |     |                                                                                                                                                                                                                                                                                                                                                                                                              |           |
| 30 |                                                                     |     |                                                                                                                                                                                                                                                                                                                                                                                                              |           |
| 31 | <b>Methods: Data collection, management, and analysis</b>           |     |                                                                                                                                                                                                                                                                                                                                                                                                              |           |
| 32 |                                                                     |     |                                                                                                                                                                                                                                                                                                                                                                                                              |           |
| 33 | Data collection                                                     | 18a | Plans for assessment and collection of outcome, baseline, and other trial data, including any related processes to promote data quality (eg, duplicate measurements, training of assessors) and a description of study instruments (eg, questionnaires, laboratory tests) along with their reliability and validity, if known. Reference to where data collection forms can be found, if not in the protocol | 8, 9, 12  |
| 34 | methods                                                             |     |                                                                                                                                                                                                                                                                                                                                                                                                              |           |
| 35 |                                                                     |     |                                                                                                                                                                                                                                                                                                                                                                                                              |           |
| 36 |                                                                     |     |                                                                                                                                                                                                                                                                                                                                                                                                              |           |
| 37 |                                                                     |     |                                                                                                                                                                                                                                                                                                                                                                                                              |           |
| 38 |                                                                     |     |                                                                                                                                                                                                                                                                                                                                                                                                              |           |
| 39 |                                                                     | 18b | Plans to promote participant retention and complete follow-up, including list of any outcome data to be collected for participants who discontinue or deviate from intervention protocols                                                                                                                                                                                                                    | 7         |
| 40 |                                                                     |     |                                                                                                                                                                                                                                                                                                                                                                                                              |           |
| 41 |                                                                     |     |                                                                                                                                                                                                                                                                                                                                                                                                              |           |
| 42 |                                                                     |     |                                                                                                                                                                                                                                                                                                                                                                                                              |           |
| 43 |                                                                     |     |                                                                                                                                                                                                                                                                                                                                                                                                              |           |
| 44 |                                                                     |     |                                                                                                                                                                                                                                                                                                                                                                                                              |           |
| 45 |                                                                     |     |                                                                                                                                                                                                                                                                                                                                                                                                              |           |
| 46 |                                                                     |     |                                                                                                                                                                                                                                                                                                                                                                                                              |           |

|    |                                 |     |                                                                                                                                                                                                                                                                                                                                       |    |
|----|---------------------------------|-----|---------------------------------------------------------------------------------------------------------------------------------------------------------------------------------------------------------------------------------------------------------------------------------------------------------------------------------------|----|
| 1  | Data management                 | 19  | Plans for data entry, coding, security, and storage, including any related processes to promote data quality (eg, double data entry; range checks for data values). Reference to where details of data management procedures can be found, if not in the protocol                                                                     | 12 |
| 2  |                                 |     |                                                                                                                                                                                                                                                                                                                                       |    |
| 3  |                                 |     |                                                                                                                                                                                                                                                                                                                                       |    |
| 4  |                                 |     |                                                                                                                                                                                                                                                                                                                                       |    |
| 5  | Statistical methods             | 20a | Statistical methods for analysing primary and secondary outcomes. Reference to where other details of the statistical analysis plan can be found, if not in the protocol                                                                                                                                                              | 12 |
| 6  |                                 |     |                                                                                                                                                                                                                                                                                                                                       |    |
| 7  |                                 |     |                                                                                                                                                                                                                                                                                                                                       |    |
| 8  |                                 | 20b | Methods for any additional analyses (eg, subgroup and adjusted analyses)                                                                                                                                                                                                                                                              | 12 |
| 9  |                                 |     |                                                                                                                                                                                                                                                                                                                                       |    |
| 10 |                                 | 20c | Definition of analysis population relating to protocol non-adherence (eg, as randomised analysis), and any statistical methods to handle missing data (eg, multiple imputation)                                                                                                                                                       | 12 |
| 11 |                                 |     |                                                                                                                                                                                                                                                                                                                                       |    |
| 12 |                                 |     |                                                                                                                                                                                                                                                                                                                                       |    |
| 13 |                                 |     |                                                                                                                                                                                                                                                                                                                                       |    |
| 14 | <b>Methods: Monitoring</b>      |     |                                                                                                                                                                                                                                                                                                                                       |    |
| 15 |                                 |     |                                                                                                                                                                                                                                                                                                                                       |    |
| 16 | Data monitoring                 | 21a | Composition of data monitoring committee (DMC); summary of its role and reporting structure; statement of whether it is independent from the sponsor and competing interests; and reference to where further details about its charter can be found, if not in the protocol. Alternatively, an explanation of why a DMC is not needed | 12 |
| 17 |                                 |     |                                                                                                                                                                                                                                                                                                                                       |    |
| 18 |                                 |     |                                                                                                                                                                                                                                                                                                                                       |    |
| 19 |                                 |     |                                                                                                                                                                                                                                                                                                                                       |    |
| 20 |                                 |     |                                                                                                                                                                                                                                                                                                                                       |    |
| 21 |                                 |     |                                                                                                                                                                                                                                                                                                                                       |    |
| 22 |                                 | 21b | Description of any interim analyses and stopping guidelines, including who will have access to these interim results and make the final decision to terminate the trial                                                                                                                                                               | 13 |
| 23 |                                 |     |                                                                                                                                                                                                                                                                                                                                       |    |
| 24 |                                 |     |                                                                                                                                                                                                                                                                                                                                       |    |
| 25 | Harms                           | 22  | Plans for collecting, assessing, reporting, and managing solicited and spontaneously reported adverse events and other unintended effects of trial interventions or trial conduct                                                                                                                                                     | 13 |
| 26 |                                 |     |                                                                                                                                                                                                                                                                                                                                       |    |
| 27 |                                 |     |                                                                                                                                                                                                                                                                                                                                       |    |
| 28 | Auditing                        | 23  | Frequency and procedures for auditing trial conduct, if any, and whether the process will be independent from investigators and the sponsor                                                                                                                                                                                           | 13 |
| 29 |                                 |     |                                                                                                                                                                                                                                                                                                                                       |    |
| 30 |                                 |     |                                                                                                                                                                                                                                                                                                                                       |    |
| 31 |                                 |     |                                                                                                                                                                                                                                                                                                                                       |    |
| 32 | <b>Ethics and dissemination</b> |     |                                                                                                                                                                                                                                                                                                                                       |    |
| 33 |                                 |     |                                                                                                                                                                                                                                                                                                                                       |    |
| 34 | Research ethics approval        | 24  | Plans for seeking research ethics committee/institutional review board (REC/IRB) approval                                                                                                                                                                                                                                             | 13 |
| 35 |                                 |     |                                                                                                                                                                                                                                                                                                                                       |    |
| 36 |                                 |     |                                                                                                                                                                                                                                                                                                                                       |    |
| 37 | Protocol amendments             | 25  | Plans for communicating important protocol modifications (eg, changes to eligibility criteria, outcomes, analyses) to relevant parties (eg, investigators, REC/IRBs, trial participants, trial registries, journals, regulators)                                                                                                      | 13 |
| 38 |                                 |     |                                                                                                                                                                                                                                                                                                                                       |    |
| 39 |                                 |     |                                                                                                                                                                                                                                                                                                                                       |    |
| 40 |                                 |     |                                                                                                                                                                                                                                                                                                                                       |    |
| 41 |                                 |     |                                                                                                                                                                                                                                                                                                                                       |    |
| 42 |                                 |     |                                                                                                                                                                                                                                                                                                                                       |    |

|    |                               |     |                                                                                                                                                                                                                                                                                     |            |
|----|-------------------------------|-----|-------------------------------------------------------------------------------------------------------------------------------------------------------------------------------------------------------------------------------------------------------------------------------------|------------|
| 1  | Consent or assent             | 26a | Who will obtain informed consent or assent from potential trial participants or authorised surrogates, and how (see Item 32)                                                                                                                                                        | 8, 13      |
| 2  |                               |     |                                                                                                                                                                                                                                                                                     |            |
| 3  |                               |     |                                                                                                                                                                                                                                                                                     |            |
| 4  |                               | 26b | Additional consent provisions for collection and use of participant data and biological specimens in ancillary studies, if applicable                                                                                                                                               | N/A        |
| 5  |                               |     |                                                                                                                                                                                                                                                                                     |            |
| 6  |                               |     |                                                                                                                                                                                                                                                                                     |            |
| 7  | Confidentiality               | 27  | How personal information about potential and enrolled participants will be collected, shared, and maintained in order to protect confidentiality before, during, and after the trial                                                                                                | 13         |
| 8  |                               |     |                                                                                                                                                                                                                                                                                     |            |
| 9  |                               |     |                                                                                                                                                                                                                                                                                     |            |
| 10 | Declaration of interests      | 28  | Financial and other competing interests for principal investigators for the overall trial and each study site                                                                                                                                                                       | 15         |
| 11 |                               |     |                                                                                                                                                                                                                                                                                     |            |
| 12 |                               |     |                                                                                                                                                                                                                                                                                     |            |
| 13 | Access to data                | 29  | Statement of who will have access to the final trial dataset, and disclosure of contractual agreements that limit such access for investigators                                                                                                                                     | N/A        |
| 14 |                               |     |                                                                                                                                                                                                                                                                                     |            |
| 15 |                               |     |                                                                                                                                                                                                                                                                                     |            |
| 16 |                               |     |                                                                                                                                                                                                                                                                                     |            |
| 17 | Ancillary and post-trial care | 30  | Provisions, if any, for ancillary and post-trial care, and for compensation to those who suffer harm from trial participation                                                                                                                                                       | Supp. PICF |
| 18 |                               |     |                                                                                                                                                                                                                                                                                     |            |
| 19 |                               |     |                                                                                                                                                                                                                                                                                     |            |
| 20 | Dissemination policy          | 31a | Plans for investigators and sponsor to communicate trial results to participants, healthcare professionals, the public, and other relevant groups (eg, via publication, reporting in results databases, or other data sharing arrangements), including any publication restrictions | 14         |
| 21 |                               |     |                                                                                                                                                                                                                                                                                     |            |
| 22 |                               |     |                                                                                                                                                                                                                                                                                     |            |
| 23 |                               |     |                                                                                                                                                                                                                                                                                     |            |
| 24 |                               | 31b | Authorship eligibility guidelines and any intended use of professional writers                                                                                                                                                                                                      | N/A        |
| 25 |                               |     |                                                                                                                                                                                                                                                                                     |            |
| 26 |                               | 31c | Plans, if any, for granting public access to the full protocol, participant-level dataset, and statistical code                                                                                                                                                                     | N/A        |
| 27 |                               |     |                                                                                                                                                                                                                                                                                     |            |
| 28 |                               |     |                                                                                                                                                                                                                                                                                     |            |
| 29 | <b>Appendices</b>             |     |                                                                                                                                                                                                                                                                                     |            |
| 30 |                               |     |                                                                                                                                                                                                                                                                                     |            |
| 31 | Informed consent materials    | 32  | Model consent form and other related documentation given to participants and authorised surrogates                                                                                                                                                                                  | Supp. PICF |
| 32 |                               |     |                                                                                                                                                                                                                                                                                     |            |
| 33 |                               |     |                                                                                                                                                                                                                                                                                     |            |
| 34 | Biological specimens          | 33  | Plans for collection, laboratory evaluation, and storage of biological specimens for genetic or molecular analysis in the current trial and for future use in ancillary studies, if applicable                                                                                      | Supp. PICF |
| 35 |                               |     |                                                                                                                                                                                                                                                                                     |            |
| 36 |                               |     |                                                                                                                                                                                                                                                                                     |            |

37 \*It is strongly recommended that this checklist be read in conjunction with the SPIRIT 2013 Explanation & Elaboration for important clarification on the items.  
 38 Amendments to the protocol should be tracked and dated. The SPIRIT checklist is copyrighted by the SPIRIT Group under the Creative Commons  
 39 "[Attribution-NonCommercial-NoDerivs 3.0 Unported](https://creativecommons.org/licenses/by-nc-nd/3.0/)" license.  
 40

# BMJ Open

## Study protocol for a randomised controlled trial evaluating the effect of folic acid supplementation beyond the first trimester on maternal plasma unmetabolised folic acid in late gestation

|                                 |                                                                                                                                                                                                                                                                                                                                                                                                                                                                                                                                                                                                                                                                                                                                                                                                                                                                                                                                                                                                                                                                                                                                                  |
|---------------------------------|--------------------------------------------------------------------------------------------------------------------------------------------------------------------------------------------------------------------------------------------------------------------------------------------------------------------------------------------------------------------------------------------------------------------------------------------------------------------------------------------------------------------------------------------------------------------------------------------------------------------------------------------------------------------------------------------------------------------------------------------------------------------------------------------------------------------------------------------------------------------------------------------------------------------------------------------------------------------------------------------------------------------------------------------------------------------------------------------------------------------------------------------------|
| Journal:                        | <i>BMJ Open</i>                                                                                                                                                                                                                                                                                                                                                                                                                                                                                                                                                                                                                                                                                                                                                                                                                                                                                                                                                                                                                                                                                                                                  |
| Manuscript ID                   | bmjopen-2020-040416.R1                                                                                                                                                                                                                                                                                                                                                                                                                                                                                                                                                                                                                                                                                                                                                                                                                                                                                                                                                                                                                                                                                                                           |
| Article Type:                   | Protocol                                                                                                                                                                                                                                                                                                                                                                                                                                                                                                                                                                                                                                                                                                                                                                                                                                                                                                                                                                                                                                                                                                                                         |
| Date Submitted by the Author:   | 21-Aug-2020                                                                                                                                                                                                                                                                                                                                                                                                                                                                                                                                                                                                                                                                                                                                                                                                                                                                                                                                                                                                                                                                                                                                      |
| Complete List of Authors:       | Sulistyoningrum, Dian; South Australian Health and Medical Research Institute, Women and Kids; The University of Adelaide, Adelaide Medical School<br>Green, Tim; South Australian Health and Medical Research Institute, Women and Kids; The University of Adelaide, Adelaide Medical School<br>Palmer, Debbie; Telethon Kids Institute<br>Sullivan, Thomas; South Australian Health and Medical Research Institute, Women and Kids; The University of Adelaide Faculty of Health and Medical Sciences, School of Public Health<br>Wood, Simon; Curtin University Faculty of Health Sciences, School of Public Health; The University of British Columbia, Food, Nutrition and Health Program<br>Makrides, Maria; South Australian Health and Medical Research Institute, Women and Kids; The University of Adelaide, Adelaide Medical School<br>Skubisz, Monika; South Australian Health and Medical Research Institute, Women and Kids; The University of Adelaide, Adelaide Medical School<br>Best, Karen; South Australian Health and Medical Research Institute, Women and Kids Theme; The University of Adelaide, Adelaide Medical School |
| <b>Primary Subject Heading</b>: | Nutrition and metabolism                                                                                                                                                                                                                                                                                                                                                                                                                                                                                                                                                                                                                                                                                                                                                                                                                                                                                                                                                                                                                                                                                                                         |
| Secondary Subject Heading:      | Obstetrics and gynaecology, Public health                                                                                                                                                                                                                                                                                                                                                                                                                                                                                                                                                                                                                                                                                                                                                                                                                                                                                                                                                                                                                                                                                                        |
| Keywords:                       | NUTRITION & DIETETICS, OBSTETRICS, PUBLIC HEALTH                                                                                                                                                                                                                                                                                                                                                                                                                                                                                                                                                                                                                                                                                                                                                                                                                                                                                                                                                                                                                                                                                                 |
|                                 |                                                                                                                                                                                                                                                                                                                                                                                                                                                                                                                                                                                                                                                                                                                                                                                                                                                                                                                                                                                                                                                                                                                                                  |

SCHOLARONE™  
Manuscripts



I, the Submitting Author has the right to grant and does grant on behalf of all authors of the Work (as defined in the below author licence), an exclusive licence and/or a non-exclusive licence for contributions from authors who are: i) UK Crown employees; ii) where BMJ has agreed a CC-BY licence shall apply, and/or iii) in accordance with the terms applicable for US Federal Government officers or employees acting as part of their official duties; on a worldwide, perpetual, irrevocable, royalty-free basis to BMJ Publishing Group Ltd ("BMJ") its licensees and where the relevant Journal is co-owned by BMJ to the co-owners of the Journal, to publish the Work in this journal and any other BMJ products and to exploit all rights, as set out in our [licence](#).

The Submitting Author accepts and understands that any supply made under these terms is made by BMJ to the Submitting Author unless you are acting as an employee on behalf of your employer or a postgraduate student of an affiliated institution which is paying any applicable article publishing charge ("APC") for Open Access articles. Where the Submitting Author wishes to make the Work available on an Open Access basis (and intends to pay the relevant APC), the terms of reuse of such Open Access shall be governed by a Creative Commons licence – details of these licences and which [Creative Commons](#) licence will apply to this Work are set out in our licence referred to above.

Other than as permitted in any relevant BMJ Author's Self Archiving Policies, I confirm this Work has not been accepted for publication elsewhere, is not being considered for publication elsewhere and does not duplicate material already published. I confirm all authors consent to publication of this Work and authorise the granting of this licence.

1  
2  
3 **Study protocol for a randomised controlled trial evaluating the effect of folic acid**  
4 **supplementation beyond the first trimester on maternal plasma unmetabolised folic acid in**  
5 **late gestation**  
6  
7

8 Dian C. Sulistyoningrum<sup>1,2</sup>, Timothy J. Green<sup>1,2</sup>, Debra J. Palmer<sup>3</sup>, Thomas R. Sullivan<sup>1,4</sup>, Simon  
9 Wood<sup>5,6,7</sup>, Maria Makrides<sup>1,2</sup>, Monika Skubisz<sup>1,2</sup>, Karen P. Best<sup>1,2\*</sup>

10  
11  
12 <sup>1</sup> SAHMRI Women and Kids Theme, South Australia Health and Medical Research Institute,  
13 Adelaide, South Australia, Australia

14 <sup>2</sup> Adelaide Medical School, The University of Adelaide, Adelaide, South Australia, Australia

15 <sup>3</sup> Telethon Kids Institute, University of Western Australia, 15 Hospital Avenue, Nedlands,  
16 Western Australia, 6009, Australia

17 <sup>4</sup> School of Public Health, Faculty of Health and Medical Sciences, The University of Adelaide,  
18 South Australia, Australia.

19 <sup>5</sup> School of Public Health, Faculty of Health Sciences, Curtin University, Perth, WA 6845,  
20 Australia

21 <sup>6</sup> Food, Nutrition and Health Program, University of British Columbia, Vancouver, BC V6T1Z4,  
22 Canada.

23 <sup>7</sup> InovoBiologic Inc., Calgary, AB Y2N4Y7, Canada.

24  
25  
26  
27  
28  
29 \*Corresponding author: Dr Karen P Best, 72 King William Road, North Adelaide, Australia,  
30 5006; Phone: +61 8-8128-4404; Email: karen.best@sahmri.com

31  
32  
33 **Word Count:** 2952 (max 4000 excluding title page, abstract, references, figures and tables)

34  
35  
36 **Keywords:** Pregnancy, unmetabolised folic acid, folic acid, red blood cell folate, periconception,  
37 policy, prenatal supplementation

38  
39 **Abbreviations**

40  
41  
42  
43  
44  
45  
46  
47  
48  
49  
50  
51  
52  
53  
54  
55  
56  
57

|        |                                                      |
|--------|------------------------------------------------------|
| UMFA   | : unmetabolised folic acid                           |
| NTD    | : neural tube defect                                 |
| MTHFR  | : methylene tetrahydrofolate reductase               |
| RBC    | : red blood cell                                     |
| REDCap | : Research Electronic Data Capture                   |
| SAHMRI | : South Australian Health Medical Research Institute |
| HREC   | : Human Research Ethics Committees                   |
| WCH    | : Women's and Children's Hospital                    |
| FMC    | : Flinders Medical Centre                            |
| GMP    | : Good Manufacturing Product                         |
| DQES   | : Dietary Questionnaire for Epidemiological Studies  |

58  
59  
60  
Caption for Figure 1. Folic Acid Trial Schedule

## ABSTRACT

**Introduction:** Taking folic acid containing supplements prior to and during early pregnancy reduces the risk of neural tube defects. Neural tube defects occur prior to 28 days post-conception, after which, there is no proven benefit of continuing to take folic acid. However, many women continue to take folic acid containing supplements throughout pregnancy. At higher intakes, folic acid is not converted to its active form and accumulates in circulation as unmetabolised folic acid (UMFA). Recently, concerns have been raised about possible links between late gestation folic acid supplementation and childhood allergy, metabolic disease and autism spectrum disorders. We aim to determine if removing folic acid from prenatal micronutrient supplements after 12 weeks gestation reduces circulating levels of maternal UMFA at 36 weeks gestation.

**Methods and analysis:** This is a parallel design, double-blinded randomised controlled trial. Women  $\geq 12$  and  $< 16$  weeks' gestation with a singleton pregnancy and able to give informed consent are eligible to participate. Women (n=100; 50 per group) will be randomised to receive either a micronutrient supplement containing 0.8mg of folic acid or a micronutrient supplement without folic acid daily from enrolment until delivery. The primary outcome is plasma UMFA concentration at 36 weeks gestation. Secondary outcomes include red blood cell folate and total plasma folate concentration. We will assess whether there is a difference in mean UMFA levels at 36 weeks gestation between groups using linear regression with adjustment for baseline UMFA levels and gestational age at trial entry. The treatment effect will be described as a mean difference with 95% confidence interval.

Caption for Figure 1. Folic Acid Trial Schedule

1  
2  
3 **Ethics and Dissemination:** Ethical approval has been granted from the Women's and Children's  
4 Health Network Research Ethics Committee (HREC/19/WCHN/018). The results of this trial  
5 will be presented at scientific conferences and published in peer-reviewed journals.  
6  
7

8  
9 **Trial Registration Number:** ACTRN12619001511123.  
10  
11

## 12 13 14 **STRENGTHS AND LIMITATIONS OF THIS STUDY**

- 15  
16  
17     ▪ We will determine if discontinuing folic acid supplementation after 12 weeks of gestation  
18         results in lower levels of unmetabolised folic acid.
- 19  
20     ▪ Unmetabolised folic acid is a biomarker of excess folic, and has been associated with a  
21         number of adverse pregnancy outcomes.
- 22  
23     ▪ This study is not powered to determine the effect of continuing folic acid supplements  
24         after the first trimester on clinical outcomes.
- 25  
26     ▪ The study findings will be generalisable to countries which like Austria have mandatory  
27         folic acid fortification
- 28  
29     ▪ This research will inform the need for larger trials to determine if folic acid beyond the  
30         first trimester leads to adverse maternal and infant health outcomes.  
31  
32  
33  
34  
35  
36  
37  
38  
39  
40  
41  
42  
43  
44  
45  
46  
47  
48  
49  
50  
51  
52  
53  
54  
55  
56  
57

58  
59  
60  
Caption for Figure 1. Folic Acid Trial Schedule



## INTRODUCTION

Evidence from randomised controlled trials (1,2) and a large public health intervention (3) showed that taking folic acid containing supplements prior to and during early pregnancy reduces the incidence of neural tube defects (NTD). Based on these findings, public health agencies around the world issued recommendations advising women to take folic acid supplements prior to conception and during early pregnancy.(4) For example, in Australia the government recommends that women trying to become pregnant take a folic acid supplement of 0.5 mg/day 12 weeks prior to conceiving and for the first 12 weeks of pregnancy.(5)

The neural tube closes in the first month of pregnancy, beyond this time there is no proven benefit of taking folic acid.(6) However, many women continue to take folic acid as part of a prenatal vitamin and mineral supplement throughout pregnancy.(7) In Australia, for example, a randomised controlled trial of pregnant women showed that more than 80% of women were taking a prenatal supplement containing folic acid at some time during their pregnancy,(8) with the market leading supplement containing 0.8 mg of folic acid. Furthermore, almost 80 countries, including Australia, have mandated the addition of folic acid to food staples, typically wheat flour, to reduce NTDs in unplanned pregnancies.(9) As such, the combination of food fortification along with prenatal supplement use may expose women and their fetus to excessive amounts of folic acid.

There is emerging evidence that higher intakes of folic acid in pregnancy may have negative health effects on the offspring including autism spectrum disorders (10–12) and insulin resistance. (13) An increased risk of childhood allergic disease is chief amongst these concerns with several studies reporting an inverse association with folic acid (14–16) (17–24) However, results are inconsistent and some studies report no relationship between folic acid intake and allergy outcomes in offspring (25–27) or a reduction in risk of allergic disease.(28) These

Caption for Figure 1. Folic Acid Trial Schedule

1  
2  
3 studies vary greatly in regard to the timing and measurement of exposure and only one study  
4  
5 differentiated between maternal total plasma folate and maternal plasma unmetabolized folic acid  
6  
7 (UMFA).(29)

8  
9  
10 Folic acid is the synthetic form of the vitamin folate that is used in supplements and fortified  
11  
12 foods because of its high bioavailability and stability compared to naturally occurring folate in  
13  
14 food.(30) Once consumed, folic acid must be converted into an active form, 5-  
15  
16 methyltetrahydrofolate.(31) At higher intakes folic acid is not converted to its active form and  
17  
18 accumulates in plasma as unmetabolised folic acid (UMFA).(32) Circulating UMFA has been  
19  
20 proposed as a biomarker of excess folic acid intake.(33) Without proven benefit and with the  
21  
22 suggestion of harm, the amount of folic acid in prenatal supplements may need to be reduced  
23  
24 after the first trimester. We aim to determine if removing folic acid from prenatal multivitamin  
25  
26 supplements after the first trimester (12 weeks gestation) reduces the accumulation of maternal  
27  
28 UMFA measured at 36 weeks gestation.  
29  
30  
31  
32  
33  
34

### 35 **Hypotheses**

36  
37 Removing folic acid from prenatal supplements after 12 weeks of gestation will limit the  
38  
39 accumulation of UMFA in maternal plasma at 36 weeks of gestation.  
40  
41  
42  
43

## 44 **METHODS AND ANALYSIS**

### 45 **Trial design**

46  
47 A multicentre two arm parallel design, double-blinded randomised controlled trial.  
48  
49

### 50 **Participating Centres**

51  
52  
53  
54  
55  
56  
57  
58  
59  
60  
Caption for Figure 1. Folic Acid Trial Schedule

1  
2  
3 The sponsoring institution and Trial Coordinating Centre is the South Australian Health and  
4 Medical Research Institute (SAHMRI) based at the Women's and Children's Hospital (WCH).  
5  
6 We will also seek approval to conduct the trial at Flinders Medical Centre (FMC), Adelaide, South  
7  
8  
9  
10 Australia.

### 11 12 **Study Population**

13  
14  
15 Participants are pregnant women with a singleton pregnancy enrolled between  $\geq 12$  and  $< 16$   
16 weeks gestation. Enrolment commenced on 18th December 2019 and recruitment is on-going.  
17  
18 Data collection will continue through to May 2021.  
19  
20  
21

### 22 **Eligibility Criteria**

#### 23 *Inclusion Criteria*

24  
25 To be eligible for participation women must be:

- 26  
27 1) Carrying a singleton pregnancy  $\geq 12$  and  $< 16$  weeks gestation and;
- 28  
29 2) Currently taking a folic acid containing supplement and planning to continue this throughout  
30 pregnancy and;
- 31  
32 3) Able to give informed consent.

#### 33 *Exclusion criteria*

34  
35 Women will be ineligible for trial participation if they meet any the following criteria:

- 36  
37 1) Carrying a fetus with a confirmed or suspected fetal abnormality.
- 38  
39 2) Unwilling to cease current folic acid containing supplement/s.
- 40  
41 3) Past history of a NTD affected pregnancy.
- 42  
43 4) Currently taking medication known to interfere with folate metabolism (e.g. methotrexate,  
44 sulphasalazine, anti-convulsants, antimalarials or barbiturates).
- 45  
46 5) Known haemolytic anaemia or haemoglobinopathy.

47  
48  
49  
50  
51  
52  
53  
54  
55  
56  
57  
58  
59  
60  
Caption for Figure 1. Folic Acid Trial Schedule

1  
2  
3 6) Known to carry the TT variant of the methylene tetrahydrofolate reductase gene (MTHFR  
4 C77T) polymorphism.  
5

6  
7 7) Intolerance or allergy to prenatal vitamin and mineral supplements.  
8  
9

### 10 11 12 13 **Study treatments**

14  
15  
16 Participating women will be randomised to receive either a micronutrient supplement in tablet  
17 form, containing 0.8 mg folic acid (the dose in the most commonly used supplement in Australia)  
18 or an identical micronutrient supplement containing no folic acid. The composition of  
19 micronutrients within the intervention and control supplements are formulated to approximate  
20 leading brands of prenatal micronutrient supplements available in Australia, **Table 1**.  
21  
22

23  
24  
25 Intervention and control supplements are identical in size, shape, colour and packaging and only  
26 differ in the removal of folic acid from the intervention supplement. Women will be asked to  
27 consume one supplement per day from enrolment ( $\geq 12$  and  $< 16$  weeks of gestation) until  
28 delivery.  
29  
30  
31  
32  
33  
34  
35

### 36 37 **Manufacture of study supplements**

38  
39  
40 Intevention and control supplements are manufactured in a licensed facility in accordance with  
41 the Code of Good Manufacturing Practice (GMP) for Medicinal Products and have been donated  
42 to the trial by Factors Group of Companies, Coquitlam, British Columbia, Canada. The  
43 supplements are packaged and labelled in accordance with GMP including an individual product  
44 identifier (ID), batch number, expiry date and the statement 'for clinical trial use only'. The  
45 pharmacist or the investigator's designee maintains accurate records of the dispensing of study  
46 product. Unused study supplements will be destroyed in compliance with applicable regulations.  
47  
48  
49  
50  
51  
52  
53  
54  
55  
56  
57

58  
59  
60  
Caption for Figure 1. Folic Acid Trial Schedule

### **Monitoring adherence to study treatment**

Research personnel will maintain regular contact with participating women to monitor and encourage supplement adherence and study compliance and answer any questions as they arise.

At each contact, women will be asked if they have missed any supplements in the last week and if so, how many have been missed. Women will be asked to return unused supplements at the final study visit (36 weeks' gestation) and the proportion of supplements returned will serve as the primary measure of compliance. A woman will be classified as compliant if she takes greater than 80% of her study supplements. At this visit women will be issued with enough supplements to last until the delivery of their baby.

### **Outcome measures**

The primary outcome is maternal plasma UMFA concentration at 36 weeks gestation.

#### *Secondary outcomes*

- Maternal plasma total and red blood cell (RBC) folate levels at 36 weeks' gestation.
- Gestational age at birth, birth weight, birth length, birth head circumference.

#### *Safety outcomes*

- Neonatal complications requiring admission to the neonatal unit.
- Pregnancy complications requiring hospital admission.
- Serious adverse events defined as: maternal or fetal (>20 weeks) deaths, fetal loss (< 20 weeks), maternal or neonatal admissions to intensive care and major congenital anomalies.

### **Participant timeline**

Caption for Figure 1. Folic Acid Trial Schedule

1  
2  
3 Women will be randomised and asked to cease their current prenatal supplements immediately  
4 and for the duration of the study. At enrolment, following informed consent and prior to  
5  
6 commencement of the study treatment, research personnel will collect baseline clinical and  
7  
8 demographic data including: contact details, self-reported ethnicity, gravida, parity, age,  
9  
10 supplement and prescription drug use, weight, height, highest level of education, occupation and  
11  
12 smoking status. Maternal dietary intakes of folate and other one-carbon nutrients during early  
13  
14 and late pregnancy will be collected with the use of an 80-item semi-quantitative food-frequency  
15  
16 questionnaire – Dietary Questionnaire for Epidemiological Studies (DQES v3.2).(34) A 10ml  
17  
18 venous blood sample will be collected by venepuncture to assess UMFA, folate status and full  
19  
20 blood count. The time the woman last ate and drank as well as the time her last supplement was  
21  
22 taken will be recorded. Research personnel will contact the participant one week following the  
23  
24 enrolment visit and then monthly to ensure adherence and record adverse events, Figure 1. At 36  
25  
26 weeks' gestation participating women will attend a clinic appointment for collection of venous  
27  
28 blood sample for UMFA and folate analysis and full blood count. Participants will be asked to  
29  
30 return unused supplements which will be counted as a measure of compliance. The food-  
31  
32 frequency questionnaire will be repeated and women will be given enough supplements to last  
33  
34 the remainder of their pregnancy. Following delivery, research personnel will extract details of  
35  
36 pregnancy, labour and birth from the woman and her baby's medical records. Blood samples will  
37  
38 be analysed for UMFA according to established methods.(35) Plasma folate (nmol/L) and  
39  
40 erythrocyte folate (nmol/L) concentrations will be determined using the folate microbiological  
41  
42 assay harmonized by the Centers for Disease Control and Prevention.(36)  
43  
44  
45  
46  
47  
48  
49  
50  
51  
52  
53  
54  
55  
56  
57

58 Caption for Figure 1. Folic Acid Trial Schedule  
59

## Sample size

A sample size of 90 women (45 per group) will provide >90% power to detect a standardised difference in mean UMFA concentration at 36 weeks gestation between groups of 0.60 (two-tailed  $\alpha=0.05$ , correlation between UMFA concentrations at baseline and 36 weeks of gestation=0.60).(29) Calculations were performed based on a standardised mean difference (mean difference divided by standard deviation of outcome at 36 weeks gestation) due to considerable variability in the literature in the reported standard deviation for UMFA concentration in pregnancy.(16,29) A standardised mean difference of 0.60 represents a medium effect size and would demonstrate biologically excessive folic acid consumption. To allow for 10% loss to follow-up, we will randomise 50 women per group.

## Recruitment

Pregnant women will be recruited through a combination of flyers, posters, a digital media campaign and through in-person recruitment at antenatal clinics. Women who meet eligibility criteria and agree to participate are invited to attend an enrolment appointment at our research clinics at the Women's and Children's Hospital or Flinders Medical Centre, Adelaide between 12 and 16 weeks gestation.

## Randomisation procedures

Participants will be randomised using a secure web-based randomisation service. Allocation will follow a computer-generated randomisation schedule using balanced variable block sizes, prepared by an independent statistician who is not involved with trial participants or data analysis. A unique four-digit study identification number and a coloured coded study pack are

Caption for Figure 1. Folic Acid Trial Schedule

1  
2  
3 assigned to each participant. Stratification will be by gestational age at trial entry 12 to  $\leq 14$   
4 weeks or  $>14$  to 16 weeks gestation.  
5  
6

### 7 8 **Blinding** 9

10 The independent unblinded statistician (not involved in any other way in the trial) allocated two  
11 colours to the intervention group and two colours to the control group. Supplements were  
12 subsequently packaged and labelled with a colour by two unblinded staff members who have no  
13 other involvement in the trial. Research personnel, participants and their family, care providers,  
14 outcome assessors, and data analysts remain blinded to colour allocation and therefore  
15 randomisation group.  
16  
17

18 The intervention and control supplements are identical in size, shape, colour, packaging and  
19 labelling and uniquely identified by the coloured product identification label (Yellow, Pink, Blue  
20 or Green) only. The randomisation code for an individual participant may be unblinded by the  
21 independent statistician in the event of an emergency.  
22  
23

### 24 25 **Data collection and trial management** 26

27 Data are collected by trained research personnel and entered directly into an electronic case-  
28 report form with password protection and defined user-level access Research Electronic Data  
29 Capture (REDCap). A record of all women approached, screened for eligibility and consented  
30 will be recorded.(37) Once consented and randomised, REDCap has been designed to  
31 automatically calculate study milestones for each participant. This information is readily  
32 available for clinical trial staff to enable scheduling of appointments and sample collection.  
33  
34 Summary reports including screening data, enrolment, appointment attendance, sample  
35 collection, serious adverse events and study completion are generated from REDCap and  
36 reviewed at monthly trial steering committee meetings. Electronic data are stored on secure  
37  
38  
39  
40  
41  
42  
43  
44  
45  
46  
47  
48  
49  
50  
51  
52  
53  
54  
55  
56  
57

58 Caption for Figure 1. Folic Acid Trial Schedule  
59



1  
2  
3 servers at South Australia Health and Medical Research Institute and released only to persons  
4  
5 authorised to receive those data.  
6  
7

### 8 **Data and Safety Monitoring** 9

10 We do not anticipate any serious adverse events related to participation in this trial. Regardless,  
11  
12 an independent (blinded) clinician will review all serious adverse events and determine whether  
13  
14 there is any likelihood that involvement in the trial could have contributed to the event.  
15

16 Determinations of causality will be made from medical records retrieved for this purpose. All  
17  
18 serious adverse events will be captured and reported to the Human Research Ethics Committee.  
19  
20  
21

### 22 **Statistical analysis** 23

24  
25 Statistical analyses will be performed on an intention-to-treat basis according to a pre-specified  
26  
27 statistical analysis plan. For the primary outcome, we will assess whether there is a difference in  
28  
29 mean UMFA levels at 36 weeks gestation between groups using linear regression, with  
30  
31 adjustment for baseline UMFA and the stratification variable gestational age at trial entry (12 to  
32  
33  $\leq 14$  weeks or  $> 14$  weeks). The treatment effect will be described as a mean difference with 95%  
34  
35 confidence interval. Secondary outcomes will be analysed using linear and logistic regression  
36  
37 models for continuous and binary outcomes, respectively, again with adjustment for gestational  
38  
39 age at trial entry. Safety outcomes will be compared between groups using Fisher exact tests. In  
40  
41 all analyses, a two-sided p-value  $< 0.05$  will be taken to indicate statistical significance.  
42  
43  
44  
45  
46

## 47 **ETHICS AND DISSEMINATION** 48

### 49 **Human Research Ethics Approval** 50

51  
52 This protocol, the informed consent and participant information document and all participant  
53  
54 communication have been approved by the Women's and Children's Health Network Research  
55  
56  
57

58 Caption for Figure 1. Folic Acid Trial Schedule  
59

1  
2  
3 Ethics Committee (HREC) (HREC/19/WCHN/018) and Governance (SSA/19/WCHN/080).  
4  
5 Governance approval has also been obtained from FMC. Any subsequent modifications will be  
6  
7 reviewed and approved by the HREC and governance of each study site. The study will be  
8  
9 conducted in compliance with the current approved version of the protocol. Any change to the  
10  
11 protocol document or informed consent form that affects the scientific intent, study design,  
12  
13 patient safety, or may affect a participant's willingness to continue participation in the study will  
14  
15 be considered a major amendment. All such amendments will be submitted to the HREC for  
16  
17 approval. Any other changes to the protocol (such as administrative changes to dates and study  
18  
19 personnel) will be considered minor amendments and will be notified to the HREC as  
20  
21 appropriate.  
22  
23  
24  
25

### 26 **Confidentiality**

27  
28  
29 Participant confidentiality is strictly held in trust by the participating investigators, research staff  
30  
31 and their agents. This confidentiality is extended to cover testing of biological samples in  
32  
33 addition to the clinical information relating to participants. Regulatory authorities may inspect all  
34  
35 documents and records required to be maintained by the Investigator, including but not limited  
36  
37 to, medical records for the women and/or infants in this study subject to individuals having  
38  
39 obtained approval/clearance through State/National Governments and HREC as required by local  
40  
41 laws. Clinical information will not be released without written permission of the parent, except as  
42  
43 necessary for monitoring by HREC or regulatory agencies.  
44  
45  
46  
47

### 48 **Patient and public involvement**

49  
50  
51 The study was supported by a consumer advisory group which provided input to the protocol. A  
52  
53 Consumer representative from our SAHMRI Women and Kids Consumer Advisory Group  
54  
55 partnered with us for the design of the study, informational material to support the intervention,  
56  
57

58 Caption for Figure 1. Folic Acid Trial Schedule

1  
2  
3 and the burden of the intervention from the participant's perspective. We will meet with the  
4  
5 consumer representative for this trial and the full Consumer Advisory group on a regular basis  
6  
7 for the duration of the study. At the end of the study, the consumer advisory group will be given  
8  
9 the opportunity to comment on the findings and contribute to the dissemination plan.  
10  
11

### 12 **Dissemination Plan**

13  
14  
15 Study findings will be submitted for peer-reviewed publication and for presentation at  
16  
17 appropriate local and international conferences. In addition, study findings will be disseminated  
18  
19 to participants through a one-page lay summary. Results will be made available to the wider  
20  
21 community through social media avenues and the SAHMRI website.  
22  
23  
24

### 25 **Authors' contributions**

26  
27  
28 KPB, TJG, MM, DP and MS conceived the trial and proposed the trial design; TS advised on  
29  
30 sample size calculations, trial design, and analysis; SW and TJG designed the prenatal  
31  
32 supplement and had it manufactured; DCS advised on analytical methodology; DCS, TJG and  
33  
34 KPB drafted the protocol, all authors contributed to refinement of the study and approved the  
35  
36 final manuscript.  
37  
38  
39

### 40 **Funding statement**

41  
42 This study is sponsored by the South Australian Health and Medical Research Institute  
43  
44 (Adelaide, Australia). This study is supported by grants in aid from the Women's and Children's  
45  
46 Hospital Foundation (Best\_WCHFG\_2020). An Ella McKnight Scholarship from the Royal  
47  
48 Australian and New Zealand College of Obstetricians and Gynaecologists supports MS. KPB is  
49  
50 supported by a Women's and Children's Hospital Foundation, MS McLeod Postdoctoral  
51  
52 Research Fellowship. DCS is supported by the Australian Government Research Training  
53  
54  
55  
56  
57

58 Caption for Figure 1. Folic Acid Trial Schedule

1  
2  
3 Program Scholarship from The University of Adelaide. The study product is donated by Factors  
4  
5 Group of Companies, Coquitlam, British Columbia, Canada. The funder/s have no role in the  
6  
7 study design; collection, management, analysis, and interpretation of data; writing of the report;  
8  
9 and the decision to submit the report for publication and have no authority over any of these  
10  
11 activities.  
12  
13

### 14 15 **Competing interest statement**

16  
17 Dr. Makrides reports that she has a financial relationship outside the submitted work with Trajan  
18  
19 Nutrition as a member of the board. Simon Wood is a consultant for the Factors Group of  
20  
21 Companies. DCS, TJG, DJP, TS MS, and KPB have nothing to disclose.  
22  
23  
24

### 25 26 **Data sharing statement**

27  
28 Once the primary trial is published, data will be available for data sharing to appropriately  
29  
30 qualified investigators upon submission of a protocol and approval by the Trial Steering  
31  
32 Committee. Please send requests to Dr Karen P Best (karen.best@sahmri.com).  
33  
34  
35  
36  
37  
38  
39  
40  
41  
42  
43  
44  
45  
46  
47  
48  
49  
50  
51  
52  
53  
54  
55  
56  
57

58  
59  
60  
Caption for Figure 1. Folic Acid Trial Schedule

**Table 1. Ingredients of Supplements for Intervention and Control Groups**

| <b>Ingredients</b> | <b>Intervention</b> | <b>Control</b> | <b>unit</b> |
|--------------------|---------------------|----------------|-------------|
| folic acid         | 0                   | 0.8            | mg          |
| calcium            | 250                 | 250            | mg          |
| Iron               | 27                  | 27             | mg          |
| thiamine           | 1.4                 | 1.4            | mg          |
| riboflavin         | 1.4                 | 1.4            | mg          |
| niacinamide        | 18                  | 18             | mg          |
| vitamin B-6        | 1.9                 | 1.9            | mg          |
| vitamin B-12       | 2.6                 | 2.6            | mcg         |
| pantothenic acid   | 6                   | 6              | mg          |
| biotin             | 30                  | 30             | mg          |
| vitamin C          | 85                  | 85             | mg          |
| vitamin E          | 13.5                | 13.5           | IU          |
| magnesium          | 50                  | 50             | mg          |
| zinc               | 7.5                 | 7.5            | mg          |
| manganese          | 2.0                 | 2.0            | mg          |
| iodine             | 0.22                | 0.22           | mg          |
| copper             | 1                   | 1              | mg          |
| chromium           | 30                  | 1              | mcg         |
| selenium           | 30                  | 30             | mcg         |
| Vitamin D3         | 10                  | 10             | mcg         |
| b-carotene         | 2500                | 2500           | IU          |

Caption for Figure 1. Folic Acid Trial Schedule

**REFERENCES**

1. Wald N, Sneddon J. Prevention of neural tube defects: Results of the Medical Research Council Vitamin Study. *Lancet*. 1991 Jul 20;338(8760):131.
2. Czeizel AE, Dudás I. Prevention of the first occurrence of neural-tube defects by periconceptional vitamin supplementation. *N Engl J Med*. 1992 Dec 24;327(26):1832–5.
3. Crider KS, Qi YP, Devine O, Tinker SC, Berry RJ. Modeling the impact of folic acid fortification and supplementation on red blood cell folate concentrations and predicted neural tube defect risk in the United States: have we reached optimal prevention? *Am J Clin Nutr*. 2018 Jun 1;107(6):1027–34.
4. Weltgesundheitsorganisation. WHO recommendations on antenatal care for a positive pregnancy experience. Geneva, Switzerland: World Health Organization; 2016. 152 p.
5. RANZCOG - Antenatal Care during Pregnancy [Internet]. [cited 2020 Mar 11]. Available from: <https://ranzcog.edu.au/womens-health/patient-information-resources/antenatal-care-during-pregnancy>
6. Sadler TW. Embryology of neural tube development. *American Journal of Medical Genetics Part C: Seminars in Medical Genetics*. 2005;135C(1):2–8.
7. McNulty B, McNulty H, Marshall B, Ward M, Molloy AM, Scott JM, et al. Impact of continuing folic acid after the first trimester of pregnancy: findings of a randomized trial of Folic Acid Supplementation in the Second and Third Trimesters. *Am J Clin Nutr*. 2013 Jul;98(1):92–8.
8. Makrides M, Best K, Yelland L, McPhee A, Zhou S, Quinlivan J, et al. A Randomized Trial of Prenatal n–3 Fatty Acid Supplementation and Preterm Delivery. *N Engl J Med*. 2019 Sep 12;381(11):1035–45.
9. Australian Institute of Health and Welfare. Monitoring the health impacts of mandatory folic acid and iodine fortification 2016. [Internet]. 2016 [cited 2020 Mar 11]. Available from: <https://www.aihw.gov.au/reports/food-nutrition/monitoring-health-impacts-of-mandatory-folic-acid/contents/table-of-contents>
10. Levine SZ, Kodesh A, Viktorin A, Smith L, Uher R, Reichenberg A, et al. Association of Maternal Use of Folic Acid and Multivitamin Supplements in the Periods Before and During Pregnancy With the Risk of Autism Spectrum Disorder in Offspring. *JAMA Psychiatry*. 2018 Feb;75(2):176–84.
11. Raghavan R, Riley AW, Volk H, Caruso D, Hironaka L, Sices L, et al. Maternal Multivitamin Intake, Plasma Folate and Vitamin B12 Levels and Autism Spectrum Disorder Risk in Offspring. *Paediatr Perinat Epidemiol*. 2018;32(1):100–11.
12. DeSoto M, Hitlan R. Synthetic folic acid supplementation during pregnancy may increase the risk of developing autism. *J Pediatr Biochem*. 2016 Aug 1;02(04):251–61.

Caption for Figure 1. Folic Acid Trial Schedule

13. Yajnik CS, Deshpande SS, Jackson AA, Refsum H, Rao S, Fisher DJ, et al. Vitamin B12 and folate concentrations during pregnancy and insulin resistance in the offspring: the Pune Maternal Nutrition Study. *Diabetologia*. 2008 Jan;51(1):29–38.
14. McStay CL, Prescott SL, Bower C, Palmer DJ. Maternal Folic Acid Supplementation during Pregnancy and Childhood Allergic Disease Outcomes: A Question of Timing? *Nutrients* [Internet]. 2017 Feb 9 [cited 2020 Mar 11];9(2). Available from: <https://www.ncbi.nlm.nih.gov/pmc/articles/PMC5331554/>
15. Whitrow MJ, Moore VM, Rumbold AR, Davies MJ. Effect of Supplemental Folic Acid in Pregnancy on Childhood Asthma: A Prospective Birth Cohort Study. *Am J Epidemiol*. 2009 Dec 15;170(12):1486–93.
16. McGowan EC, Hong X, Selhub J, Paul L, Wood RA, Matsui EC, et al. Association Between Folate Metabolites and the Development of Food Allergy in Children. *The Journal of Allergy and Clinical Immunology: In Practice*. 2020 Jan 1;8(1):132-140.e5.
17. Bekkers MBM, Elstgeest LEM, Scholtens S, Haveman-Nies A, de Jongste JC, Kerkhof M, et al. Maternal use of folic acid supplements during pregnancy, and childhood respiratory health and atopy. *Eur Respir J*. 2012 Jun;39(6):1468–74.
18. Kiefte-de Jong JC, Timmermans S, Jaddoe VWV, Hofman A, Tiemeier H, Steegers EA, et al. High circulating folate and vitamin B-12 concentrations in women during pregnancy are associated with increased prevalence of atopic dermatitis in their offspring. *J Nutr*. 2012 Apr;142(4):731–8.
19. Dunstan JA, West C, McCarthy S, Metcalfe J, Meldrum S, Oddy WH, et al. The relationship between maternal folate status in pregnancy, cord blood folate levels, and allergic outcomes in early childhood. *Allergy*. 2012;67(1):50–7.
20. Woude PAZ der, Walle HEKD, Hoek A, Bos HJ, Boezen HM, Koppelman GH, et al. Maternal high-dose folic acid during pregnancy and asthma medication in the offspring. *Pharmacoepidemiology and Drug Safety*. 2014;23(10):1059–65.
21. Veeranki SP, Gebretsadik T, Mitchel EF, Tylavsky FA, Hartert TV, Cooper WO, et al. Maternal Folic Acid Supplementation during Pregnancy and Early Childhood Asthma. *Epidemiology*. 2015 Nov;26(6):934–41.
22. Yang T, Gu Y, Wei X, Liang X, Chen J, Liu Y, et al. Periconceptional folic acid supplementation and vitamin B12 status in a cohort of Chinese early pregnancy women with the risk of adverse pregnancy outcomes. *J Clin Biochem Nutr*. 2017 Mar;60(2):136–42.
23. Parr CL, Magnus MC, Karlstad Ø, Haugen M, Refsum H, Ueland PM, et al. Maternal Folate Intake during Pregnancy and Childhood Asthma in a Population-based Cohort. *American Journal of Respiratory and Critical Care Medicine*. 2017 Jan 15;195(2):221–8.

Caption for Figure 1. Folic Acid Trial Schedule

- 1  
2  
3 24. Håberg SE, London SJ, Stigum H, Nafstad P, Nystad W. Folic acid supplements in  
4 pregnancy and early childhood respiratory health. *Archives of Disease in Childhood*. 2009  
5 Mar 1;94(3):180–4.  
6
- 7  
8 25. Granell R, Heron J, Lewis S, Smith GD, Sterne J a. C, Henderson J. The association  
9 between mother and child MTHFR C677T polymorphisms, dietary folate intake and  
10 childhood atopy in a population-based, longitudinal birth cohort. *Clinical & Experimental  
11 Allergy*. 2008;38(2):320–8.  
12
- 13 26. MARTINUSSEN MP, BRACKEN MB, TRICHE EW, JACOBSEN GW, RISNES KR.  
14 Folic acid supplementation in early pregnancy and the risk of preeclampsia, small for  
15 gestational age offspring and preterm delivery. *Eur J Obstet Gynecol Reprod Biol*. 2015  
16 Dec;195:94–9.  
17
- 18 27. Magdelijns FJH, Mommers M, Penders J, Smits L, Thijs C. Folic Acid Use in Pregnancy  
19 and the Development of Atopy, Asthma, and Lung Function in Childhood. *Pediatrics*. 2011  
20 Jul 1;128(1):e135–44.  
21  
22
- 23 28. Fortes C, Mastroeni S, Mannooranparampil TJ, Di Lallo D. Pre-natal folic acid and iron  
24 supplementation and atopic dermatitis in the first 6 years of life. *Arch Dermatol Res*. 2019  
25 Jul 1;311(5):361–7.  
26
- 27 29. Pentieva K, Selhub J, Paul L, Molloy AM, McNulty B, Ward M, et al. Evidence from a  
28 Randomized Trial That Exposure to Supplemental Folic Acid at Recommended Levels  
29 during Pregnancy Does Not Lead to Increased Unmetabolized Folic Acid Concentrations in  
30 Maternal or Cord Blood. *J Nutr*. 2016 Mar;146(3):494–500.  
31  
32
- 33 30. Bailey LB, Gregory JF. Folate metabolism and requirements. *J Nutr*. 1999 Apr;129(4):779–  
34 82.  
35
- 36 31. IUPAC-IUB Joint Commission on Biochemical Nomenclature (JCBN). Nomenclature and  
37 symbols for folic acid and related compounds. Recommendations 1986. *Eur J Biochem*.  
38 1987 Oct 15;168(2):251–3.  
39  
40
- 41 32. Pfeiffer CM, Sternberg MR, Fazili Z, Yetley EA, Lacher DA, Bailey RL, et al.  
42 Unmetabolized Folic Acid Is Detected in Nearly All Serum Samples from US Children,  
43 Adolescents, and Adults1234. *J Nutr*. 2015 Mar;145(3):520–31.  
44
- 45 33. Plumptre L, Masih SP, Ly A, Aufreiter S, Sohn K-J, Croxford R, et al. High concentrations  
46 of folate and unmetabolized folic acid in a cohort of pregnant Canadian women and  
47 umbilical cord blood. *Am J Clin Nutr*. 2015 Oct 1;102(4):848–57.  
48  
49
- 50 34. Hodge A, Patterson AJ, Brown WJ, Ireland P, Giles G. The Anti Cancer Council of Victoria  
51 FFQ: relative validity of nutrient intakes compared with weighed food records in young to  
52 middle-aged women in a study of iron supplementation. *Australian and New Zealand  
53 Journal of Public Health*. 2000;24(6):576–83.  
54  
55  
56  
57

58 Caption for Figure 1. Folic Acid Trial Schedule



- 1  
2  
3 35. Zayed A, Bustami R, Alabsi W, El-Elimat T. Development and Validation of a Rapid High-  
4 Performance Liquid Chromatography–Tandem Mass Spectrometric Method for  
5 Determination of Folic Acid in Human Plasma. *Pharmaceuticals (Basel)* [Internet]. 2018  
6 May 27 [cited 2020 Mar 11];11(2). Available from:  
7 <https://www.ncbi.nlm.nih.gov/pmc/articles/PMC6027057/>  
8  
9  
10 36. Zhang M, Sternberg MR, Pfeiffer CM. Harmonizing the Calibrator and Microorganism  
11 Used in the Folate Microbiological Assay Increases the Comparability of Serum and  
12 Whole-Blood Folate Results in a CDC Round-Robin Study. *J Nutr.* 2018 May  
13 1;148(5):807–17.  
14  
15 37. Schulz KF, Altman DG, Moher D, the CONSORT Group. CONSORT 2010 Statement:  
16 updated guidelines for reporting parallel group randomised trials. *BMC Medicine.* 2010  
17 Mar 24;8(1):18.  
18  
19  
20

21 Caption for Figure 1. Folic Acid Trial Schedule  
22  
23  
24  
25  
26  
27  
28  
29  
30  
31  
32  
33  
34  
35  
36  
37  
38  
39  
40  
41  
42  
43  
44  
45  
46  
47  
48  
49  
50  
51  
52  
53  
54  
55  
56  
57

58 Caption for Figure 1. Folic Acid Trial Schedule  
59  
60

Figure 1. Folic Acid Trial Schedule

|                                      | Screening | Enrolment       | Allocation | +1 week        |                   | Post-allocation |                |                |                |                |  |
|--------------------------------------|-----------|-----------------|------------|----------------|-------------------|-----------------|----------------|----------------|----------------|----------------|--|
| TIMEPOINT**                          |           | -t <sub>1</sub> | 0          | t <sub>1</sub> | t <sub>1a</sub> * | t <sub>2</sub>  | t <sub>3</sub> | t <sub>4</sub> | t <sub>5</sub> | t <sub>6</sub> |  |
| <b>ENROLMENT:</b>                    | <12w      | ≥12 to <16w     |            | 13 to 17w      | 16w               | 20w             | 24w            | 28w            | 32w            | 36w            |  |
| <b>Eligibility screen</b>            | Clinic    | Clinic          | Clinic     | Phone          | SMS               | SMS             | SMS            | SMS            | Phone          | Clinic         |  |
| <b>Consent to Contact</b>            | X         | X               |            |                |                   |                 |                |                |                |                |  |
| <b>Informed consent</b>              |           | X               |            |                |                   |                 |                |                |                |                |  |
| <b>Randomisation</b>                 |           |                 | X          |                |                   |                 |                |                |                |                |  |
| <b>Demographic data</b>              |           | X               |            |                |                   |                 |                |                |                |                |  |
| <b>Allocation</b>                    |           |                 | X          |                |                   |                 |                |                |                |                |  |
| <b>INTERVENTION:</b>                 |           |                 | ←-----→    |                |                   |                 |                |                |                |                |  |
| <b>ASSESSMENTS:</b>                  |           |                 |            |                |                   |                 |                |                |                |                |  |
| <b>Maternal Folate status</b>        |           | X               |            |                |                   |                 |                |                |                | X              |  |
| <b>Maternal UMFA status</b>          |           | X               |            |                |                   |                 |                |                |                | X              |  |
| <b>Food Frequency Questionnaire</b>  |           | X               |            |                |                   |                 |                |                |                | X              |  |
| <b>Adverse events</b>                |           |                 |            |                | X                 | X               |                | X              |                | X              |  |
| <b>Serious Adverse events</b>        |           |                 |            |                |                   |                 |                |                |                | X              |  |
| <b>Compliance – maternal report</b>  |           |                 |            |                | X                 | X               | X              | X              | X              | X              |  |
| <b>Compliance – Supplement count</b> |           |                 |            |                |                   |                 |                |                |                | X              |  |

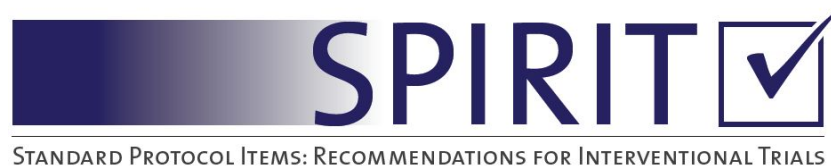

STANDARD PROTOCOL ITEMS: RECOMMENDATIONS FOR INTERVENTIONAL TRIALS

SPIRIT 2013 Checklist: Recommended items to address in a clinical trial protocol and related documents\*

| Section/item                      | Item No | Description                                                                                                                                                                                                                                                                              | Addressed on page number |
|-----------------------------------|---------|------------------------------------------------------------------------------------------------------------------------------------------------------------------------------------------------------------------------------------------------------------------------------------------|--------------------------|
| <b>Administrative information</b> |         |                                                                                                                                                                                                                                                                                          |                          |
| Title                             | 1       | Descriptive title identifying the study design, population, interventions, and, if applicable, trial acronym                                                                                                                                                                             | 1                        |
| Trial registration                | 2a      | Trial identifier and registry name. If not yet registered, name of intended registry                                                                                                                                                                                                     | 3                        |
|                                   | 2b      | All items from the World Health Organization Trial Registration Data Set                                                                                                                                                                                                                 | Yes                      |
| Protocol version                  | 3       | Date and version identifier                                                                                                                                                                                                                                                              | Supp.                    |
| Funding                           | 4       | Sources and types of financial, material, and other support                                                                                                                                                                                                                              | 14-15                    |
| Roles and responsibilities        | 5a      | Names, affiliations, and roles of protocol contributors                                                                                                                                                                                                                                  | 1                        |
|                                   | 5b      | Name and contact information for the trial sponsor                                                                                                                                                                                                                                       | N/A                      |
|                                   | 5c      | Role of study sponsor and funders, if any, in study design; collection, management, analysis, and interpretation of data; writing of the report; and the decision to submit the report for publication, including whether they will have ultimate authority over any of these activities | N/A                      |
|                                   | 5d      | Composition, roles, and responsibilities of the coordinating centre, steering committee, endpoint adjudication committee, data management team, and other individuals or groups overseeing the trial, if applicable (see Item 21a for data monitoring committee)                         | 12, 13                   |

1 **Introduction**

|    |                                                           |     |                                                                                                               |                   |
|----|-----------------------------------------------------------|-----|---------------------------------------------------------------------------------------------------------------|-------------------|
| 2  |                                                           |     |                                                                                                               |                   |
| 3  | Background and                                            | 6a  | Description of research question and justification for undertaking the trial, including summary of relevant   | 4-5               |
| 4  | rationale                                                 |     | studies (published and unpublished) examining benefits and harms for each intervention                        |                   |
| 5  |                                                           |     |                                                                                                               |                   |
| 6  |                                                           | 6b  | Explanation for choice of comparators                                                                         | 4-5               |
| 7  |                                                           |     |                                                                                                               |                   |
| 8  | Objectives                                                | 7   | Specific objectives or hypotheses                                                                             | 5, 8              |
| 9  |                                                           |     |                                                                                                               |                   |
| 10 | Trial design                                              | 8   | Description of trial design including type of trial (eg, parallel group, crossover, factorial, single group), |                   |
| 11 |                                                           |     | allocation ratio, and framework (eg, superiority, equivalence, noninferiority, exploratory)                   | 5                 |
| 12 |                                                           |     |                                                                                                               |                   |
| 13 |                                                           |     |                                                                                                               |                   |
| 14 | <b>Methods: Participants, interventions, and outcomes</b> |     |                                                                                                               |                   |
| 15 |                                                           |     |                                                                                                               |                   |
| 16 | Study setting                                             | 9   | Description of study settings (eg, community clinic, academic hospital) and list of countries where data will | 5                 |
| 17 |                                                           |     | be collected. Reference to where list of study sites can be obtained                                          |                   |
| 18 |                                                           |     |                                                                                                               |                   |
| 19 | Eligibility criteria                                      | 10  | Inclusion and exclusion criteria for participants. If applicable, eligibility criteria for study centres and  | 6                 |
| 20 |                                                           |     | individuals who will perform the interventions (eg, surgeons, psychotherapists)                               |                   |
| 21 |                                                           |     |                                                                                                               |                   |
| 22 | Interventions                                             | 11a | Interventions for each group with sufficient detail to allow replication, including how and when they will be | 7                 |
| 23 |                                                           |     | administered                                                                                                  |                   |
| 24 |                                                           |     |                                                                                                               |                   |
| 25 |                                                           | 11b | Criteria for discontinuing or modifying allocated interventions for a given trial participant (eg, drug dose  | N/A               |
| 26 |                                                           |     | change in response to harms, participant request, or improving/worsening disease)                             |                   |
| 27 |                                                           |     |                                                                                                               |                   |
| 28 |                                                           | 11c | Strategies to improve adherence to intervention protocols, and any procedures for monitoring adherence        | 7                 |
| 29 |                                                           |     | (eg, drug tablet return, laboratory tests)                                                                    |                   |
| 30 |                                                           |     |                                                                                                               |                   |
| 31 |                                                           | 11d | Relevant concomitant care and interventions that are permitted or prohibited during the trial                 | N/A               |
| 32 |                                                           |     |                                                                                                               |                   |
| 33 | Outcomes                                                  | 12  | Primary, secondary, and other outcomes, including the specific measurement variable (eg, systolic blood       |                   |
| 34 |                                                           |     | pressure), analysis metric (eg, change from baseline, final value, time to event), method of aggregation (eg, | 8                 |
| 35 |                                                           |     | median, proportion), and time point for each outcome. Explanation of the clinical relevance of chosen         |                   |
| 36 |                                                           |     | efficacy and harm outcomes is strongly recommended                                                            |                   |
| 37 |                                                           |     |                                                                                                               |                   |
| 38 | Participant timeline                                      | 13  | Time schedule of enrolment, interventions (including any run-ins and washouts), assessments, and visits for   | 8, 9, 10 & Fig. 1 |
| 39 |                                                           |     | participants. A schematic diagram is highly recommended (see Figure)                                          |                   |
| 40 |                                                           |     |                                                                                                               |                   |
| 41 |                                                           |     |                                                                                                               |                   |
| 42 |                                                           |     |                                                                                                               |                   |
| 43 |                                                           |     |                                                                                                               |                   |
| 44 |                                                           |     |                                                                                                               |                   |
| 45 |                                                           |     |                                                                                                               |                   |
| 46 |                                                           |     |                                                                                                               |                   |

|    |                                                                     |     |                                                                                                                                                                                                                                                                                                                                                                                                              |           |
|----|---------------------------------------------------------------------|-----|--------------------------------------------------------------------------------------------------------------------------------------------------------------------------------------------------------------------------------------------------------------------------------------------------------------------------------------------------------------------------------------------------------------|-----------|
| 1  | Sample size                                                         | 14  | Estimated number of participants needed to achieve study objectives and how it was determined, including clinical and statistical assumptions supporting any sample size calculations                                                                                                                                                                                                                        | 10, 11    |
| 2  |                                                                     |     |                                                                                                                                                                                                                                                                                                                                                                                                              |           |
| 3  |                                                                     |     |                                                                                                                                                                                                                                                                                                                                                                                                              |           |
| 4  | Recruitment                                                         | 15  | Strategies for achieving adequate participant enrolment to reach target sample size                                                                                                                                                                                                                                                                                                                          | 11        |
| 5  |                                                                     |     |                                                                                                                                                                                                                                                                                                                                                                                                              |           |
| 6  |                                                                     |     |                                                                                                                                                                                                                                                                                                                                                                                                              |           |
| 7  | <b>Methods: Assignment of interventions (for controlled trials)</b> |     |                                                                                                                                                                                                                                                                                                                                                                                                              |           |
| 8  | Allocation:                                                         |     |                                                                                                                                                                                                                                                                                                                                                                                                              |           |
| 9  |                                                                     |     |                                                                                                                                                                                                                                                                                                                                                                                                              |           |
| 10 | Sequence                                                            | 16a | Method of generating the allocation sequence (eg, computer-generated random numbers), and list of any factors for stratification. To reduce predictability of a random sequence, details of any planned restriction (eg, blocking) should be provided in a separate document that is unavailable to those who enrol participants or assign interventions                                                     | 11        |
| 11 | generation                                                          |     |                                                                                                                                                                                                                                                                                                                                                                                                              |           |
| 12 |                                                                     |     |                                                                                                                                                                                                                                                                                                                                                                                                              |           |
| 13 |                                                                     |     |                                                                                                                                                                                                                                                                                                                                                                                                              |           |
| 14 |                                                                     |     |                                                                                                                                                                                                                                                                                                                                                                                                              |           |
| 15 |                                                                     |     |                                                                                                                                                                                                                                                                                                                                                                                                              |           |
| 16 | Allocation                                                          | 16b | Mechanism of implementing the allocation sequence (eg, central telephone; sequentially numbered, opaque, sealed envelopes), describing any steps to conceal the sequence until interventions are assigned                                                                                                                                                                                                    | 11        |
| 17 | concealment                                                         |     |                                                                                                                                                                                                                                                                                                                                                                                                              |           |
| 18 | mechanism                                                           |     |                                                                                                                                                                                                                                                                                                                                                                                                              |           |
| 19 |                                                                     |     |                                                                                                                                                                                                                                                                                                                                                                                                              |           |
| 20 | Implementation                                                      | 16c | Who will generate the allocation sequence, who will enrol participants, and who will assign participants to interventions                                                                                                                                                                                                                                                                                    | 8, 11, 12 |
| 21 |                                                                     |     |                                                                                                                                                                                                                                                                                                                                                                                                              |           |
| 22 |                                                                     |     |                                                                                                                                                                                                                                                                                                                                                                                                              |           |
| 23 |                                                                     |     |                                                                                                                                                                                                                                                                                                                                                                                                              |           |
| 24 | Blinding (masking)                                                  | 17a | Who will be blinded after assignment to interventions (eg, trial participants, care providers, outcome assessors, data analysts), and how                                                                                                                                                                                                                                                                    | 11, 12    |
| 25 |                                                                     |     |                                                                                                                                                                                                                                                                                                                                                                                                              |           |
| 26 |                                                                     |     |                                                                                                                                                                                                                                                                                                                                                                                                              |           |
| 27 |                                                                     | 17b | If blinded, circumstances under which unblinding is permissible, and procedure for revealing a participant's allocated intervention during the trial                                                                                                                                                                                                                                                         | 12        |
| 28 |                                                                     |     |                                                                                                                                                                                                                                                                                                                                                                                                              |           |
| 29 |                                                                     |     |                                                                                                                                                                                                                                                                                                                                                                                                              |           |
| 30 |                                                                     |     |                                                                                                                                                                                                                                                                                                                                                                                                              |           |
| 31 | <b>Methods: Data collection, management, and analysis</b>           |     |                                                                                                                                                                                                                                                                                                                                                                                                              |           |
| 32 |                                                                     |     |                                                                                                                                                                                                                                                                                                                                                                                                              |           |
| 33 | Data collection                                                     | 18a | Plans for assessment and collection of outcome, baseline, and other trial data, including any related processes to promote data quality (eg, duplicate measurements, training of assessors) and a description of study instruments (eg, questionnaires, laboratory tests) along with their reliability and validity, if known. Reference to where data collection forms can be found, if not in the protocol | 8, 9, 12  |
| 34 | methods                                                             |     |                                                                                                                                                                                                                                                                                                                                                                                                              |           |
| 35 |                                                                     |     |                                                                                                                                                                                                                                                                                                                                                                                                              |           |
| 36 |                                                                     |     |                                                                                                                                                                                                                                                                                                                                                                                                              |           |
| 37 |                                                                     |     |                                                                                                                                                                                                                                                                                                                                                                                                              |           |
| 38 |                                                                     |     |                                                                                                                                                                                                                                                                                                                                                                                                              |           |
| 39 |                                                                     | 18b | Plans to promote participant retention and complete follow-up, including list of any outcome data to be collected for participants who discontinue or deviate from intervention protocols                                                                                                                                                                                                                    | 7         |
| 40 |                                                                     |     |                                                                                                                                                                                                                                                                                                                                                                                                              |           |
| 41 |                                                                     |     |                                                                                                                                                                                                                                                                                                                                                                                                              |           |
| 42 |                                                                     |     |                                                                                                                                                                                                                                                                                                                                                                                                              |           |
| 43 |                                                                     |     |                                                                                                                                                                                                                                                                                                                                                                                                              |           |
| 44 |                                                                     |     |                                                                                                                                                                                                                                                                                                                                                                                                              |           |
| 45 |                                                                     |     |                                                                                                                                                                                                                                                                                                                                                                                                              |           |
| 46 |                                                                     |     |                                                                                                                                                                                                                                                                                                                                                                                                              |           |

|    |                                 |     |                                                                                                                                                                                                                                                                                                                                       |    |
|----|---------------------------------|-----|---------------------------------------------------------------------------------------------------------------------------------------------------------------------------------------------------------------------------------------------------------------------------------------------------------------------------------------|----|
| 1  | Data management                 | 19  | Plans for data entry, coding, security, and storage, including any related processes to promote data quality (eg, double data entry; range checks for data values). Reference to where details of data management procedures can be found, if not in the protocol                                                                     | 12 |
| 2  |                                 |     |                                                                                                                                                                                                                                                                                                                                       |    |
| 3  |                                 |     |                                                                                                                                                                                                                                                                                                                                       |    |
| 4  |                                 |     |                                                                                                                                                                                                                                                                                                                                       |    |
| 5  | Statistical methods             | 20a | Statistical methods for analysing primary and secondary outcomes. Reference to where other details of the statistical analysis plan can be found, if not in the protocol                                                                                                                                                              | 12 |
| 6  |                                 |     |                                                                                                                                                                                                                                                                                                                                       |    |
| 7  |                                 |     |                                                                                                                                                                                                                                                                                                                                       |    |
| 8  |                                 | 20b | Methods for any additional analyses (eg, subgroup and adjusted analyses)                                                                                                                                                                                                                                                              | 12 |
| 9  |                                 |     |                                                                                                                                                                                                                                                                                                                                       |    |
| 10 |                                 | 20c | Definition of analysis population relating to protocol non-adherence (eg, as randomised analysis), and any statistical methods to handle missing data (eg, multiple imputation)                                                                                                                                                       | 12 |
| 11 |                                 |     |                                                                                                                                                                                                                                                                                                                                       |    |
| 12 |                                 |     |                                                                                                                                                                                                                                                                                                                                       |    |
| 13 |                                 |     |                                                                                                                                                                                                                                                                                                                                       |    |
| 14 | <b>Methods: Monitoring</b>      |     |                                                                                                                                                                                                                                                                                                                                       |    |
| 15 |                                 |     |                                                                                                                                                                                                                                                                                                                                       |    |
| 16 | Data monitoring                 | 21a | Composition of data monitoring committee (DMC); summary of its role and reporting structure; statement of whether it is independent from the sponsor and competing interests; and reference to where further details about its charter can be found, if not in the protocol. Alternatively, an explanation of why a DMC is not needed | 12 |
| 17 |                                 |     |                                                                                                                                                                                                                                                                                                                                       |    |
| 18 |                                 |     |                                                                                                                                                                                                                                                                                                                                       |    |
| 19 |                                 |     |                                                                                                                                                                                                                                                                                                                                       |    |
| 20 |                                 |     |                                                                                                                                                                                                                                                                                                                                       |    |
| 21 |                                 |     |                                                                                                                                                                                                                                                                                                                                       |    |
| 22 |                                 | 21b | Description of any interim analyses and stopping guidelines, including who will have access to these interim results and make the final decision to terminate the trial                                                                                                                                                               | 13 |
| 23 |                                 |     |                                                                                                                                                                                                                                                                                                                                       |    |
| 24 |                                 |     |                                                                                                                                                                                                                                                                                                                                       |    |
| 25 | Harms                           | 22  | Plans for collecting, assessing, reporting, and managing solicited and spontaneously reported adverse events and other unintended effects of trial interventions or trial conduct                                                                                                                                                     | 13 |
| 26 |                                 |     |                                                                                                                                                                                                                                                                                                                                       |    |
| 27 |                                 |     |                                                                                                                                                                                                                                                                                                                                       |    |
| 28 | Auditing                        | 23  | Frequency and procedures for auditing trial conduct, if any, and whether the process will be independent from investigators and the sponsor                                                                                                                                                                                           | 13 |
| 29 |                                 |     |                                                                                                                                                                                                                                                                                                                                       |    |
| 30 |                                 |     |                                                                                                                                                                                                                                                                                                                                       |    |
| 31 |                                 |     |                                                                                                                                                                                                                                                                                                                                       |    |
| 32 | <b>Ethics and dissemination</b> |     |                                                                                                                                                                                                                                                                                                                                       |    |
| 33 |                                 |     |                                                                                                                                                                                                                                                                                                                                       |    |
| 34 | Research ethics approval        | 24  | Plans for seeking research ethics committee/institutional review board (REC/IRB) approval                                                                                                                                                                                                                                             | 13 |
| 35 |                                 |     |                                                                                                                                                                                                                                                                                                                                       |    |
| 36 |                                 |     |                                                                                                                                                                                                                                                                                                                                       |    |
| 37 | Protocol amendments             | 25  | Plans for communicating important protocol modifications (eg, changes to eligibility criteria, outcomes, analyses) to relevant parties (eg, investigators, REC/IRBs, trial participants, trial registries, journals, regulators)                                                                                                      | 13 |
| 38 |                                 |     |                                                                                                                                                                                                                                                                                                                                       |    |
| 39 |                                 |     |                                                                                                                                                                                                                                                                                                                                       |    |
| 40 |                                 |     |                                                                                                                                                                                                                                                                                                                                       |    |
| 41 |                                 |     |                                                                                                                                                                                                                                                                                                                                       |    |
| 42 |                                 |     |                                                                                                                                                                                                                                                                                                                                       |    |

|    |                               |     |                                                                                                                                                                                                                                                                                     |            |
|----|-------------------------------|-----|-------------------------------------------------------------------------------------------------------------------------------------------------------------------------------------------------------------------------------------------------------------------------------------|------------|
| 1  | Consent or assent             | 26a | Who will obtain informed consent or assent from potential trial participants or authorised surrogates, and how (see Item 32)                                                                                                                                                        | 8, 13      |
| 2  |                               |     |                                                                                                                                                                                                                                                                                     |            |
| 3  |                               |     |                                                                                                                                                                                                                                                                                     |            |
| 4  |                               | 26b | Additional consent provisions for collection and use of participant data and biological specimens in ancillary studies, if applicable                                                                                                                                               | N/A        |
| 5  |                               |     |                                                                                                                                                                                                                                                                                     |            |
| 6  |                               |     |                                                                                                                                                                                                                                                                                     |            |
| 7  | Confidentiality               | 27  | How personal information about potential and enrolled participants will be collected, shared, and maintained in order to protect confidentiality before, during, and after the trial                                                                                                | 13         |
| 8  |                               |     |                                                                                                                                                                                                                                                                                     |            |
| 9  |                               |     |                                                                                                                                                                                                                                                                                     |            |
| 10 | Declaration of interests      | 28  | Financial and other competing interests for principal investigators for the overall trial and each study site                                                                                                                                                                       | 15         |
| 11 |                               |     |                                                                                                                                                                                                                                                                                     |            |
| 12 |                               |     |                                                                                                                                                                                                                                                                                     |            |
| 13 | Access to data                | 29  | Statement of who will have access to the final trial dataset, and disclosure of contractual agreements that limit such access for investigators                                                                                                                                     | N/A        |
| 14 |                               |     |                                                                                                                                                                                                                                                                                     |            |
| 15 |                               |     |                                                                                                                                                                                                                                                                                     |            |
| 16 |                               |     |                                                                                                                                                                                                                                                                                     |            |
| 17 | Ancillary and post-trial care | 30  | Provisions, if any, for ancillary and post-trial care, and for compensation to those who suffer harm from trial participation                                                                                                                                                       | Supp. PICF |
| 18 |                               |     |                                                                                                                                                                                                                                                                                     |            |
| 19 |                               |     |                                                                                                                                                                                                                                                                                     |            |
| 20 | Dissemination policy          | 31a | Plans for investigators and sponsor to communicate trial results to participants, healthcare professionals, the public, and other relevant groups (eg, via publication, reporting in results databases, or other data sharing arrangements), including any publication restrictions | 14         |
| 21 |                               |     |                                                                                                                                                                                                                                                                                     |            |
| 22 |                               |     |                                                                                                                                                                                                                                                                                     |            |
| 23 |                               |     |                                                                                                                                                                                                                                                                                     |            |
| 24 |                               | 31b | Authorship eligibility guidelines and any intended use of professional writers                                                                                                                                                                                                      | N/A        |
| 25 |                               |     |                                                                                                                                                                                                                                                                                     |            |
| 26 |                               | 31c | Plans, if any, for granting public access to the full protocol, participant-level dataset, and statistical code                                                                                                                                                                     | N/A        |
| 27 |                               |     |                                                                                                                                                                                                                                                                                     |            |
| 28 |                               |     |                                                                                                                                                                                                                                                                                     |            |
| 29 | <b>Appendices</b>             |     |                                                                                                                                                                                                                                                                                     |            |
| 30 |                               |     |                                                                                                                                                                                                                                                                                     |            |
| 31 | Informed consent materials    | 32  | Model consent form and other related documentation given to participants and authorised surrogates                                                                                                                                                                                  | Supp. PICF |
| 32 |                               |     |                                                                                                                                                                                                                                                                                     |            |
| 33 |                               |     |                                                                                                                                                                                                                                                                                     |            |
| 34 | Biological specimens          | 33  | Plans for collection, laboratory evaluation, and storage of biological specimens for genetic or molecular analysis in the current trial and for future use in ancillary studies, if applicable                                                                                      | Supp. PICF |
| 35 |                               |     |                                                                                                                                                                                                                                                                                     |            |
| 36 |                               |     |                                                                                                                                                                                                                                                                                     |            |

37 \*It is strongly recommended that this checklist be read in conjunction with the SPIRIT 2013 Explanation & Elaboration for important clarification on the items.  
 38 Amendments to the protocol should be tracked and dated. The SPIRIT checklist is copyrighted by the SPIRIT Group under the Creative Commons  
 39 “[Attribution-NonCommercial-NoDerivs 3.0 Unported](https://creativecommons.org/licenses/by-nc-nd/3.0/)” license.  
 40  
 41  
 42
